# Supplementary material for: Congenital myasthenic syndromes in adults: clinical features, diagnosis and long-term prognosis
Source: PubMed Central journal article supplement — Brain. 2024 May 2;147(11):3849–62. doi: 10.1093/brain/awae124 (PMC11531845; doi:10.1093/brain/awae124), 2024-05-02
Supplement: awae124_supplementary_data.pdf [file awae124_supplementary_data.pdf]

**Supplementary Table I: List of patients and variants identified in the cohort.**

| Patient | Gene                  | Status                | Variant 1                                                            | Variant 2                                   |
|---------|-----------------------|-----------------------|----------------------------------------------------------------------|---------------------------------------------|
| 1       | <i>AGRN</i>           | Homozygous            | c.1214G>A p.Cys405Tyr (C406Y, exon 7/36)                             | /                                           |
| 2       | <i>AGRN</i>           | Homozygous            | c.5125G>C p.Gly1709Arg (G1709R, exon 29/36)                          | /                                           |
| 3       | <i>AGRN</i>           | Compound heterozygous | c.5012G>A p.Arg1671Gln (R1671Q, exon 29/36)                          | c.5093G>C p.Arg1698Pro (R1698P, exon 29/36) |
| 4       | <i>AGRN</i>           | Homozygous            | c.5611G>A p.Gly1871Arg (exon 33/36)                                  | /                                           |
| 5       | <i>AGRN</i>           | Homozygous            | c.5125G>C p.Gly1709Arg (G1709R, exon 29)                             | /                                           |
| 6       | <i>AGRN</i>           | Compound heterozygous | c.314A>T p.Asn105Ile (N105I, exon 2/36)                              | c.1362dup p.Ser445Glnfs*8 (exon 7/36)       |
| 7       | <i>AGRN</i>           | Compound heterozygous | c.314A>T p.Asn105Ile (N105I, exon 2/36)                              | c.1362dup p.Ser445Glnfs*8 (exon 7/36)       |
| 8       | <i>AGRN</i>           | Compound heterozygous | c.3664G>C p.Ala1222Pro                                               | c.5084T>C p.Leu1695Pro                      |
| 9       | <i>AGRN</i>           | Compound heterozygous | c.3664G>C p.Ala1222Pro                                               | c.5084T>C p.Leu1695Pro                      |
| 10      | <i>AGRN</i>           | Compound heterozygous | c.3602G>C p.Arg1201Pro (exon 21)                                     | c.4525C>T p.Arg1509Trp (exon 26)            |
| 11      | <i>AGRN</i>           | Compound heterozygous | c.3602G>C p.Arg1201Pro (exon 21)                                     | c.4525C>T p.Arg1509Trp (exon 26)            |
| 12      | <i>AGRN</i>           | Homozygous            | c.[3616G>T ;3719C>T]<br>p.[Val1206Leu ;Pro1240Leu] (exons 21 and 22) | /                                           |
| 13      | <i>CHRNA1</i>         | Homozygous            | c.257G>A p.Arg86His (R86H, exon p3a)                                 | /                                           |
| 14      | <i>CHRNA1</i> (SCCMS) | Simple heterozygous   | c.517G>A p.Gly173Ser (G153S, exon 5)                                 | /                                           |
| 15      | <i>CHRNA1</i> (SCCMS) | Simple heterozygous   | c.517G>A p.Gly173Ser (G153S, exon 5)                                 | /                                           |
| 16      | <i>CHRNA1</i> (SCCMS) | Simple heterozygous   | c.517G>A p.Gly173Ser (G153S, exon 5)                                 | /                                           |
| 17      | <i>CHRNA1</i> (SCCMS) | Simple heterozygous   | c.517G>A p.Gly173Ser (G153S, exon 5)                                 | /                                           |
| 18      | <i>CHRNA1</i> (SCCMS) | Simple heterozygous   | c.517G>A p.Gly173Ser (G153S, exon 5)                                 | /                                           |
| 19      | <i>CHRNA1</i> (SCCMS) | Simple heterozygous   | c.517G>A p.Gly173Ser (G153S, exon 5)                                 | /                                           |
| 20      | <i>CHRNA1</i> (SCCMS) | Simple heterozygous   | c.517G>A p.Gly173Ser (G153S, exon 5)                                 | /                                           |
| 21      | <i>CHRNA1</i> (SCCMS) | Simple heterozygous   | c.517G>A p.Gly173Ser (G153S, exon 5)                                 | /                                           |
| 22      | <i>CHRNA1</i> (SCCMS) | Simple heterozygous   | c.821C>T p.Thr274Ile (T254I, exon 7/12)                              | /                                           |
| 23      | <i>CHRNA1</i> (SCCMS) | Simple heterozygous   | c.821C>T p.Thr274Ile (T254I, exon 7/12)                              | /                                           |
| 24      | <i>CHRNA1</i> (SCCMS) | Simple heterozygous   | c.517G>A p.Gly173Ser (G153S, exon 5)                                 | /                                           |
| 25      | <i>CHRNA1</i> (SCCMS) | Simple heterozygous   | c.517G>A p.Gly173Ser (G153S, exon 5)                                 | /                                           |
| 26      | <i>CHRNA1</i> (SCCMS) | Simple heterozygous   | c.517G>A p.Gly173Ser (G153S, exon 5)                                 | /                                           |
| 27      | <i>CHRNA1</i> (SCCMS) | Simple heterozygous   | c.517G>A p.Gly173Ser (G153S, exon 5)                                 | /                                           |
| 28      | <i>CHRNE</i> (SCCMS)  | Simple heterozygous   | c.835G>C p.Val279Leu (V259L, exon 8/12)                              | /                                           |
| 29      | <i>CHRNE</i> (SCCMS)  | Simple heterozygous   | c.835G>C p.Val279Leu (V259L, exon 8/12)                              | /                                           |
| 30      | <i>CHRNE</i> (SCCMS)  | Simple heterozygous   | c.721C>T p.Leu241Phe (L221F, exon 7/12)                              | /                                           |
| 31      | <i>CHRNE</i> (SCCMS)  | Simple heterozygous   | c.721C>T p.Leu241Phe (L221F, exon 7/12)                              | /                                           |
| 32      | <i>CHRNE</i> (SCCMS)  | Simple heterozygous   | c.721C>T p.Leu241Phe (L221F, exon 7/12)                              | /                                           |
| 33      | <i>CHRNE</i> (SCCMS)  | Simple heterozygous   | c.865C>T p.Leu289Phe (L269F, exon 8/12)                              | /                                           |
| 34      | <i>CHRNBI</i>         | Compound heterozygous | c.516C>G p.Tyr172*                                                   | c.727C>T p.Arg243Cys                        |
| 35      | <i>CHRND</i>          | Compound heterozygous | c.826G>A p.Glu276Lys (exon 8)                                        | c.862C>G p.Gln288Glu (exon 8)               |
| 36      | <i>CHRND</i>          | Compound heterozygous | c.243+1G>A p.? (intron 3)                                            | c.389A>T p.Asn130Ile (exon 5)               |
| 37      | <i>CHRND</i>          | Homozygous            | c.991C>T p.Leu331Phe                                                 | /                                           |
| 38      | <i>CHRND</i>          | Compound heterozygous | c.982_983del p.Val328Hisfs*17<br>(919 920delGT, exon 9)              | c.1334 T>C p.Ile445Thr (I424T, exon 11)     |

|    |              |                       |                                                                               |                                                     |
|----|--------------|-----------------------|-------------------------------------------------------------------------------|-----------------------------------------------------|
| 39 | <i>CHRNE</i> | Compound heterozygous | c.130dupG p.Glu44Glyfs*3 (70insG, exon 2/12)                                  | c.556_563del p.(Gly186Hisfs*13) (exon 6/12)         |
| 40 | <i>CHRNE</i> | Homozygous            | c.1327-10_1338dup22 p.Trp447Profs*16 (intron 11 and exon 12)                  | /                                                   |
| 41 | <i>CHRNE</i> | Homozygous            | c.1002_1008dupCACCCAC p.Ala337Hisfs*62 (exon 9)                               | /                                                   |
| 42 | <i>CHRNE</i> | Homozygous            | c.130dupG p.Glu44Glyfs*3 (70insG, exon 2/12)                                  | /                                                   |
| 43 | <i>CHRNE</i> | Homozygous            | c.905C>G p.Pro302Arg                                                          | /                                                   |
| 44 | <i>CHRNE</i> | Homozygous            | c.905C>G p.Pro302Arg                                                          | /                                                   |
| 45 | <i>CHRNE</i> | Compound heterozygous | c.629 G>T p.Cys210Phe                                                         | c.1353dup p.Asn452GlufsX4                           |
| 46 | <i>CHRNE</i> | Homozygous            | c.1327del p.Glu443Lysfs*64 (11267delG, exon 12/12)                            | /                                                   |
| 47 | <i>CHRNE</i> | Homozygous            | c.1353dupG p.Asn452Glufs*4 (1293insG, exon 12/12)                             | /                                                   |
| 48 | <i>CHRNE</i> | Homozygous            | c.355 C>T p.Gln119* (Q99X, exon 5/12)                                         | /                                                   |
| 49 | <i>CHRNE</i> | Compound heterozygous | c.1327del p.Glu443Lysfs*64 (11267delG, exon 12/12)                            | c.1457_1458dupCC p.Tyr487Profs*21 (exon 12/12)      |
| 50 | <i>CHRNE</i> | Compound heterozygous | c.962delA p.Asn321Ilefs*64 (902delA, exon 9/12)                               | c.1216_1219+19del p. ? (exon 10 and intron 10)      |
| 51 | <i>CHRNE</i> | Homozygous            | c.1353dupG p.Asn452Glufs*4 (1293insG, exon 12/12)                             | /                                                   |
| 52 | <i>CHRNE</i> | Homozygous            | c.1353dupG p.Asn452Glufs*4 (1293insG, exon 12/12)                             | /                                                   |
| 53 | <i>CHRNE</i> | Homozygous            | c.130dupG p.Glu44Glyfs*3 (70insG, exon 2/12)                                  | /                                                   |
| 54 | <i>CHRNE</i> | Compound heterozygous | c.130dupG p.Glu44Glyfs*3 (70insG, exon 2/12)                                  | c.888_889delGA p.Glu296Aspfs*100 (exon 8/12)        |
| 55 | <i>CHRNE</i> | Homozygous            | c.130dupG p.Glu44Glyfs*3 (70insG, exon 2/12)                                  | /                                                   |
| 56 | <i>CHRNE</i> | Homozygous            | c.130dupG p.Glu44Glyfs*3 (70insG, exon 2/12)                                  | /                                                   |
| 57 | <i>CHRNE</i> | Homozygous            | c.1327del p.Glu443Lysfs*64 (11267delG, exon 12/12)                            | /                                                   |
| 58 | <i>CHRNE</i> | Homozygous            | c.915 C>T p.Gly305Gly (G305G, exon 8)                                         | /                                                   |
| 59 | <i>CHRNE</i> | Homozygous            | c.130dupG p.Glu44Glyfs*3 (70insG, exon 2/12)                                  | /                                                   |
| 60 | <i>CHRNE</i> | Compound heterozygous | c.250C>T p.Arg84* (R64X, exon 4/12)                                           | c.971delT p.Ile324Thrfs*61 (exon 9/12)              |
| 61 | <i>CHRNE</i> | Compound heterozygous | c.[325G>A;c.581T>C]<br>p.[Glu109Lys;Ile194Thr] (E89K-I174T, exons 4 and 6/12) | c.872C>T p.Ala291Val (A271V, exon 8/12)             |
| 62 | <i>CHRNE</i> | Compound heterozygous | c.[325G>A;c.581T>C]<br>p.[Glu109Lys;Ile194Thr] (E89K-I174T, exons 4 and 6/12) | c.872C>T p.Ala291Val (A271V, exon 8/12)             |
| 63 | <i>CHRNE</i> | Homozygous            | c.1327del p.Glu443Lysfs*64 (11267delG, exon 12/12)                            | /                                                   |
| 64 | <i>CHRNE</i> | Homozygous            | c.1327del p.Glu443Lysfs*64 (11267delG, exon 12/12)                            | /                                                   |
| 65 | <i>CHRNE</i> | Homozygous            | c.1327del p.Glu443Lysfs*64 (11267delG, exon 12/12)                            | /                                                   |
| 66 | <i>CHRNE</i> | Homozygous            | c.130dupG p.Glu44Glyfs*3 (70insG, exon 2/12)                                  | /                                                   |
| 67 | <i>CHRNE</i> | Compound heterozygous | c.980A>T p.Asn327Ile (N307I, exon 9/12)                                       | c.1353dupG p.Asn452Glufs*4 (1293insG, exon 12/12)   |
| 68 | <i>CHRNE</i> | Homozygous            | c.1353dupG p.Asn452Glufs*4 (1293insG, exon 12/12)                             | /                                                   |
| 69 | <i>CHRNE</i> | Homozygous            | c.130dupG p.Glu44Glyfs*3 (70insG, exon 2/12)                                  | /                                                   |
| 70 | <i>CHRNE</i> | Homozygous            | c.1327del p.Glu443Lysfs*64 (11267delG, exon 12/12)                            | /                                                   |
| 71 | <i>CHRNE</i> | Homozygous            | c.1327del p.Glu443Lysfs*64 (11267delG, exon 12/12)                            | /                                                   |
| 72 | <i>CHRNE</i> | Compound heterozygous | c.239_258delinsT p.Trp80Phefs*10 (exon 4/12)                                  | c.501-16G>A with alternative splicing (intron 5/11) |
| 73 | <i>CHRNE</i> | Homozygous            | c.1353dupG p.Asn452Glufs*4 (1293insG, exon 12/12)                             | /                                                   |
| 74 | <i>CHRNE</i> | Homozygous            | c.130dupG p.Glu44Glyfs*3 (70insG, exon 2/12)                                  | /                                                   |
| 75 | <i>CHRNE</i> | Compound heterozygous | c.905C>G p.Pro302Arg                                                          | c.601+2T>A                                          |

|     |                      |                       |                                                    |                                                    |
|-----|----------------------|-----------------------|----------------------------------------------------|----------------------------------------------------|
| 76  | <i>CHRNE</i>         | Compound heterozygous | c.130dupG p.Glu44Glyfs*3 (70insG, exon 2/12)       | c.1327-1G>A (intron 11/11)                         |
| 77  | <i>CHRNE</i>         | Homozygous            | c.1327del p.Glu443Lysfs*64 (11267delG, exon 12/12) | /                                                  |
| 78  | <i>CHRNE</i>         | Compound heterozygous | c.130dupG p.Glu44Glyfs*3 (70insG, exon 2/12)       | c.1353dupG p.Asn452Gluufs*4 (1293insG, exon 12/12) |
| 79  | <i>CHRNE</i>         | Homozygous            | c.1353dupG p.Asn452Gluufs*4 (1293insG, exon 12/12) | /                                                  |
| 80  | <i>CHRNE</i>         | Compound heterozygous | c.130dupG p.Glu44Glyfs*3 (70insG, exon 2/12)       | c.601+1G>A p.? (intron 6)                          |
| 81  | <i>CHRNE</i>         | Homozygous            | c.535A>C p.Thr179Pro (T159P, exon 6)               | /                                                  |
| 82  | <i>CHRNE</i>         | Homozygous            | c.310_328dup (exon 4)                              | /                                                  |
| 83  | <i>CHRNE</i>         | Homozygous            | c.1353dupG p.Asn452Gluufs*4 (1293insG, exon 12/12) | /                                                  |
| 84  | <i>CHRNE</i>         | Homozygous            | c.1353dupG p.Asn452Gluufs*4 (1293insG, exon 12/12) | /                                                  |
| 85  | <i>CHRNE</i>         | Homozygous            | c.1327del p.Glu443Lysfs*64 (11267delG, exon 12/12) | /                                                  |
| 86  | <i>CHRNE</i>         | Homozygous            | c.712C>T p.Arg238Trp (R218W, exon 7/12)            | /                                                  |
| 87  | <i>CHRNE</i>         | Compound heterozygous | c.130dupG p.Glu44Glyfs*3 (70insG, exon 2/12)       | c.1353dupG p.Asn452Gluufs*4 (1293insG, exon 12/12) |
| 88  | <i>CHRNE</i>         | Homozygous            | c.1353dupG p.Asn452Gluufs*4 (1293insG, exon 12/12) | /                                                  |
| 89  | <i>CHRNE</i>         | Homozygous            | c.1353dupG p.Asn452Gluufs*4 (1293insG, exon 12/12) | /                                                  |
| 90  | <i>CHRNE</i>         | Homozygous            | c.1353dupG p.Asn452Gluufs*4 (1293insG, exon 12/12) | /                                                  |
| 91  | <i>CHRNE</i>         | Homozygous            | c.1353dupG p.Asn452Gluufs*4 (1293insG, exon 12/12) | /                                                  |
| 92  | <i>CHRNE</i>         | Homozygous            | c.1353dupG p.Asn452Gluufs*4 (1293insG, exon 12/12) | /                                                  |
| 93  | <i>CHRNE</i>         | Compound heterozygous | c.311T>C p.Leu104Pro (L104P, exon4/12)             | c.929T>C p.Phe310Ser (F310S, exon 9/12)            |
| 94  | <i>CHRNE</i>         | Homozygous            | c.1353dupG p.Asn452Gluufs*4 (1293insG, exon 12/12) | /                                                  |
| 95  | <i>CHRNE (FCCMS)</i> | Homozygous            | c.1291 G>C p.Ala431Pro (A431P, exon 11/12)         | /                                                  |
| 96  | <i>CHRNE (FCCMS)</i> | Homozygous            | c.1291 G>C p.Ala431Pro (A431P, exon 11/12)         | /                                                  |
| 97  | <i>CHRNE (FCCMS)</i> | Homozygous            | c.1291 G>C p.Ala431Pro (A431P, exon 11/12)         | /                                                  |
| 98  | <i>CHRNE (FCCMS)</i> | Compound heterozygous | c.587_588 del CA (exon 6/12)                       | c.583G>A p.Asp195Asn (exon 6/12)                   |
| 99  | <i>COLQ</i>          | Homozygous            | c.1289A>C p.Tyr430Ser (Y430S, exon 16/17)          | /                                                  |
| 100 | <i>COLQ</i>          | Compound heterozygous | c.1082delC p.Pro361Leufs*65 (exon 15/17)           | c.1321A>G p.Ile446Thr (I446T, exon 17/17)          |
| 101 | <i>COLQ</i>          | Compound heterozygous | Deletion of exon 1,1b and 2                        | c.1289A>C p.Tyr430Ser (Y430S, exon 16/17)          |
| 102 | <i>COLQ</i>          | Compound heterozygous | c.219+1G>C (intron 2/16)                           | c.1019G>A p.Arg340His (R340H, exon 14/17)          |
| 103 | <i>COLQ</i>          | Compound heterozygous | c.219+1G>C (intron 2/16)                           | c.1019G>A p.Arg340His (R340H, exon 14/17)          |
| 104 | <i>COLQ</i>          | Homozygous            | c.1021 A>G p.Arg341Gly (R341G, exon 14/17)         | /                                                  |
| 105 | <i>COLQ</i>          | Homozygous            | c.1289A>C p.Tyr430Ser (Y430S, exon 16/17)          | /                                                  |
| 106 | <i>COLQ</i>          | Homozygous            | c.157dupC p.Leu53Profs*81 (exon 2/17)              | /                                                  |
| 107 | <i>COLQ</i>          | Compound heterozygous | Deletion of exon 1,1b and 2                        | c.1289A>C p.Tyr430Ser (Y430S, exon 16/17)          |
| 108 | <i>COLQ</i>          | Compound heterozygous | c.107-1G>A (intron 1/16)                           | c.706C>T p.Arg236Ter (R236X, exon 11/17)           |
| 109 | <i>COLQ</i>          | Compound heterozygous | c.1281C>T p.Cys427Cys (C427C, exon 16/17)          | c.1289A>C p.Tyr430Ser (Y430S, exon 16/17)          |
| 110 | <i>COLQ</i>          | Homozygous            | c.1281C>T p.Cys427Cys (C427C, exon 16/17)          | /                                                  |
| 111 | <i>COLQ</i>          | Compound heterozygous | c.1082delC p.Pro361Leufs*65 (exon 15/17)           | c.1321A>G p.Ile446Thr (I446T, exon 17/17)          |
| 112 | <i>COLQ</i>          | Compound heterozygous | c.107-1G>A (intron 1/16)                           | c.788dupC p.Pro265Alafs*37 (exon 12/17)            |
| 113 | <i>COLQ</i>          | Homozygous            | c.1228C>Tp.Arg410Trp (R410W, exon 16/17)           | /                                                  |

|     |             |                       |                                                 |                                                            |
|-----|-------------|-----------------------|-------------------------------------------------|------------------------------------------------------------|
| 114 | <i>COLQ</i> | Compound heterozygous | c.1082delC p.Pro361Leufs*65 (exon 15/17)        | c.1314C>T p.Arg452Cys                                      |
| 115 | <i>COLQ</i> | Compound heterozygous | c.1289A>C p.Tyr430Ser (Y430S, exon 16/17)       | c.706C>T p.Arg236* R236X (exon 11/17)                      |
| 116 | <i>COLQ</i> | Compound heterozygous | c.1289A>C p.Tyr430Ser (Y430S, exon 16/17)       | c.706C>T p.Arg236* R236X (exon 11/17)                      |
| 117 | <i>COLQ</i> | Homozygous            | c.1289A>C p.Tyr430Ser (Y430S, exon 16/17)       | /                                                          |
| 118 | <i>DOK7</i> | Compound heterozygous | c.346G>A p.Val116Met (V116M, exon 4/7)          | c.1124_1127dupTGCC p.Ala378Serfs*30 (exon 7/7)             |
| 119 | <i>DOK7</i> | Compound heterozygous | c.514G>A p.Gly172Arg (G172R, exon 4/7)          | c.1124_1127dupTGCC p.Ala378Serfs*30 (exon 7/7)             |
| 120 | <i>DOK7</i> | Homozygous            | c.496 G>A p.Gly166Arg (G166R, exon 4/7)         | /                                                          |
| 121 | <i>DOK7</i> | Compound heterozygous | c.54+25_55-38del15 bp (intron 1/6)              | c.1124_1127dupTGCC p.Ala378Serfs*30 (exon 7/7)             |
| 122 | <i>DOK7</i> | Compound heterozygous | c.1124_1127dupTGCC p.Ala378Serfs*30 (exon 7/7)  | c.1143delC p.Glu382Serfs*74 (exon 7/7)                     |
| 123 | <i>DOK7</i> | Compound heterozygous | c.313C>T p.Arg105Cys (R105C, exon 3/7)          | c.1124_1127dupTGCC p.Ala378Serfs*30 (exon 7/7)             |
| 124 | <i>DOK7</i> | Homozygous            | c.230C>T p.Thr77Met (T77M, exon 3/7)            | /                                                          |
| 125 | <i>DOK7</i> | Homozygous            | c.1124_1127dupTGCC p.Ala378Serfs*30 (exon 7/7)  | /                                                          |
| 126 | <i>DOK7</i> | Compound heterozygous | c.511G>C p.Gly171Arg (G171R, exon 4/7)          | c.1124_1127dupTGCC p.Ala378Serfs*30 (exon 7/7)             |
| 127 | <i>DOK7</i> | Compound heterozygous | c.511G>C p.Gly171Arg (G171R, exon 4/7)          | c.1124_1127dupTGCC p.Ala378Serfs*30 (exon 7/7)             |
| 128 | <i>DOK7</i> | Homozygous            | c.1124_1127dupTGCC p.Ala378Serfs*30 (exon 7/7)  | /                                                          |
| 129 | <i>DOK7</i> | Compound heterozygous | c.532+3A>T (intron 4)                           | c.1124_1127dupTGCC p.Ala378Serfs*30 (exon 7/7)             |
| 130 | <i>DOK7</i> | Compound heterozygous | c.532+3A>T (intron 4)                           | c.1124_1127dupTGCC p.Ala378Serfs*30 (exon 7/7)             |
| 131 | <i>DOK7</i> | Compound heterozygous | c.514 G>A p.Gly180Val (G180V, exon 4/7)         | c.1124_1127dupTGCC p.Ala378Serfs*30 (exon 7/7)             |
| 132 | <i>DOK7</i> | Compound heterozygous | c.470 T>G p.Leu157Arg (L157R, exon 4/7)         | c.1124_1127dupTGCC p.Ala378Serfs*30 (exon 7/7)             |
| 133 | <i>DOK7</i> | Compound heterozygous | c.383 C>G p.Pro128Arg (P128R, exon 4/7)         | c.1339_1342dupCTGG p.Gly448Alafs*72 (exon 7/7)             |
| 134 | <i>DOK7</i> | Compound heterozygous | c.54+25_55-38del15 bp (intron 1/6)              | c.372G>T p.Leu124Phe (L124F, exon 4/7)                     |
| 135 | <i>DOK7</i> | Homozygous            | c.773-2A>G (intron 6/6)                         | /                                                          |
| 136 | <i>DOK7</i> | Compound heterozygous | c.7G>A p.Glu3Lys (E3K, exon 1/7)                | c.1124_1127dupTGCC p.Ala378Serfs*30 (exon 7/7)             |
| 137 | <i>DOK7</i> | Compound heterozygous | c.1124_1127dupTGCC p.Ala378Serfs*30 (exon 7/7)  | c.(?_553)_(*981_?)del = délétion emportant les exons 5 à 7 |
| 138 | <i>DOK7</i> | Compound heterozygous | c.1124_1127dupTGCC p.Ala378Serfs*30 (exon 7/7)  | c.1263dupC p.Ser422Leufs*97 (exon 7/7)                     |
| 139 | <i>DOK7</i> | Compound heterozygous | c.437C>T p.Pro146Leu (P146L, exon 4/7)          | c.1124_1127dupTGCC p.Ala378Serfs*30 (exon 7/7)             |
| 140 | <i>DOK7</i> | Compound heterozygous | c.54+25_55-38del15 bp (intron 1/6)              | c.1124_1127dupTGCC p.Ala378Serfs*30 (exon 7/7)             |
| 141 | <i>DOK7</i> | Homozygous            | c.1124_1127dupTGCC p.Ala378Serfs*30 (exon 7/7)  | /                                                          |
| 142 | <i>DOK7</i> | Compound heterozygous | c.1124_1127dupTGCC p.Ala378Serfs*30 (exon 7/7)  | c.1435_1450del (exon 7/7)                                  |
| 143 | <i>DOK7</i> | Compound heterozygous | c.1124_1127dupTGCC p.Ala378Serfs*30 (exon 7/7)  | c.1435_1450del (exon 7/7)                                  |
| 144 | <i>DOK7</i> | Compound heterozygous | c.1124_1127dupTGCC p.Ala378Serfs*30 (exon 7/7)  | c.1378dup p.Gln460Profs*59 (exon 7/7)                      |
| 145 | <i>DOK7</i> | Compound heterozygous | c.1124_1127dupTGCC p.Ala378Serfs*30 (exon 7/7)  | c.437C>T p.Pro146Leu (exon 4/7)                            |
| 146 | <i>DOK7</i> | Homozygous            | c.925delG p.Glu309Lys fs*147 (exon 7/7)         | /                                                          |
| 147 | <i>DOK7</i> | Compound heterozygous | c.1124_1127dupTGCC p.Ala378Serfs*30 (exon 7/7)  | c.55-14C>A, p.Ala378Serfs*30                               |
| 148 | <i>DOK7</i> | Compound heterozygous | c.1124_1127dupTGCC p.Ala378Serfs*30 (exon 7/7)  | c.473G>A p.Arg158Gln (exon 4)                              |
| 149 | <i>DOK7</i> | Homozygous            | c.1124_1127dupTGCC p.Ala378Serfs*30 (exon 7/7)  | /                                                          |
| 150 | <i>DOK7</i> | Homozygous            | c.1431_1445delins14 p.His481AlafsX20 (exon 7/7) | /                                                          |

|     |               |                       |                                                        |                                                 |
|-----|---------------|-----------------------|--------------------------------------------------------|-------------------------------------------------|
| 151 | <i>DOK7</i>   | Compound heterozygous | c.1124_1127dupTGCC p.Ala378Serfs*30 (exon 7/7)         | c.1263dupC p.Ser422Leufs*97 (exon 7/7)          |
| 152 | <i>DOK7</i>   | Compound heterozygous | c.1124_1127dupTGCC p.Ala378Serfs*30 (exon 7/7)         | c.1332dup p.Gly445TrpfsTer74                    |
| 153 | <i>DOK7</i>   | Compound heterozygous | c.1124_1127dupTGCC p.Ala378Serfs*30 (exon 7/7)         | c.1263dupC p.Ser422Leufs*97 (exon 7/7)          |
| 154 | <i>DOK7</i>   | Compound heterozygous | c.1124_1127dupTGCC p.Ala378Serfs*30 (exon 7/7)         | c.1263dupC p.Ser422Leufs*97 (exon 7/7)          |
| 155 | <i>DOK7</i>   | Compound heterozygous | c.1124_1127dupTGCC p.Ala378Serfs*30 (exon 7/7)         | c.101-19A>G (intron 2)                          |
| 156 | <i>DOK7</i>   | Compound heterozygous | c.392T>C p.Leu131Pro (L131P, exon 4/7)                 | c.557C>T p.Ser186Leu (S186L, exon 5/7)          |
| 157 | <i>DOK7</i>   | Compound heterozygous | c.392T>C p.Leu131Pro (L131P, exon 4/7)                 | c.557C>T p.Ser186Leu (S186L, exon 5/7)          |
| 158 | <i>DOK7</i>   | Homozygous            | c.496 G>A p.Gly166Arg (G166R, exon 4/7)                | /                                               |
| 159 | <i>DOK7</i>   | Compound heterozygous | c.1124_1127dupTGCC p.Ala378Serfs*30 (exon 7/7)         | c.1361_1347del p.Leu454Profs*60                 |
| 160 | <i>DOK7</i>   | Homozygous            | c.773-2_773-1delAG (donor site, intron 6)              | /                                               |
| 161 | <i>DOK7</i>   | Compound heterozygous | c.1124_1127dupTGCC p.Ala378Serfs*30 (exon 7/7)         | c.1263dupC p.Ser422Leufs*97 (exon 7/7)          |
| 162 | <i>DPAGTI</i> | Compound heterozygous | c.271C>T p.Pro91Ser (P91S, exon 2/9)                   | c.380_395dup p.Ser133Ala*64 (exon 3/9)          |
| 163 | <i>DPAGTI</i> | Compound heterozygous | c.731A>G p.Tyr244Cys                                   | c.739C>T p.Arg247Trp                            |
| 164 | <i>DPAGTI</i> | Compound heterozygous | c.26dupT p.Met9Ilefs*80                                | c.739C>T p.Arg247Trp                            |
| 165 | <i>GFPTI</i>  | Compound heterozygous | c.332G>A p.Arg111His                                   | c.949A>T p.Met317Leu                            |
| 166 | <i>GFPTI</i>  | Compound heterozygous | c.207 G>A p.Leu69Leu (L69L, exon 3/19)                 | c.332 G>A p.Arg111His (R111H, exon 3/19)        |
| 167 | <i>GFPTI</i>  | Compound heterozygous | c.223+6G>A (intron 6/18)                               | c.*22C>A (3'UTR)                                |
| 168 | <i>GFPTI</i>  | Compound heterozygous | c.1174A>C p.Thr392Pro (T392P, exon 13/19)              | c.1496T>G p.Met499Arg (M499R, exon 15/19)       |
| 169 | <i>GFPTI</i>  | Compound heterozygous | c.331 C>T p.Arg111Cys (R111C, e4/19)                   | c.2002-1G>C (intron 18/18)                      |
| 170 | <i>GFPTI</i>  | Compound heterozygous | c.331 C>T p.Arg111Cys (R111C, e4/19)                   | c.2002-1G>C (intron 18/18)                      |
| 171 | <i>GFPTI</i>  | Compound heterozygous | Deletion of exon 11 (c.955+1_956-1) (1051+1_1052-1)del | c.1882A>G p.Ile628Val (I628V, exon 18/19)       |
| 172 | <i>GFPTI</i>  | Compound heterozygous | Deletion of exon 11 (c.955+1_956-1) (1051+1_1052-1)del | c.1882A>G p.Ile628Val (I628V, exon 18/19)       |
| 173 | <i>GFPTI</i>  | Compound heterozygous | c.1046A>G p.Asp642His                                  | c.1924G>C, p.Tyr349Cys                          |
| 174 | <i>GFPTI</i>  | Homozygous            | c.44C>T p.Thr15Met (exon 2)                            | /                                               |
| 175 | <i>GFPTI</i>  | Homozygous            | c.44C>T p.Thr15Met (exon 2)                            | /                                               |
| 176 | <i>GFPTI</i>  | Homozygous            | c.331 C>T p.Arg111Cys (R111C, e4/19)                   | /                                               |
| 177 | <i>GFPTI</i>  | Compound heterozygous | c.332G>A p.Arg111His                                   | c.*22C>A (3'UTR)                                |
| 178 | <i>GFPTI</i>  | Homozygous            | c.1534C>T p.R512W (exon 15/19)                         | /                                               |
| 179 | <i>GFPTI</i>  | Homozygous            | c.331 C>T p.Arg111Cys (R111C, e4/19)                   | /                                               |
| 180 | <i>GMPPB</i>  | Compound heterozygous | c.464G>A p.Arg155His (R155H, exon 5/9)                 | c.1045_1046insG p.Ile349Serfs*34 (exon 9/9)     |
| 181 | <i>GMPPB</i>  | Compound heterozygous | c.860G>A p.Arg287Gln (R287Q, exon 8/9)                 | NM_013334 c.1100G>A p.Gly367Glu (G367E, exon 8) |
| 182 | <i>GMPPB</i>  | Compound heterozygous | c.79G>C p.Asp27His (D27H, exon 1/9)                    | c.760G>A(p.Val254Met (V254M, exon 7/9)          |
| 183 | <i>GMPPB</i>  | Compound heterozygous | c.79G>C p.Asp27His (D27H, exon 1/9)                    | c.1043_1044insAGA p.Glu348dup                   |
| 184 | <i>MUSK</i>   | Compound heterozygous | c.220dupC p.Arg74Profs*20 (exon 3/15)                  | c.2368G>A p.Val790Met (V790M, exon 15/15)       |
| 185 | <i>MUSK</i>   | Compound heterozygous | c.203T>G p.Ile68Ser (I68S, exon 3)                     | c.2368G>A p.Val790Met (V790M, exon 15)          |
| 186 | <i>MUSK</i>   | Compound heterozygous | c.467delA p.Lys156Argfs*20 (exon 4/15)                 | c.2368G>A p.Val790Met (V790M, exon 15/15)       |
| 187 | <i>MUSK</i>   | Compound heterozygous | c.467delA p.Lys156Argfs*20 (exon 4/15)                 | c.2368G>A p.Val790Met (V790M, exon 15/15)       |
| 188 | <i>MUSK</i>   | Compound heterozygous | c.2287G>A p.Ala763Thr (exon 15/15)                     | c.232C>T P?Arg78Trp (exon 3/15)                 |

|     |                |                       |                                      |                                              |
|-----|----------------|-----------------------|--------------------------------------|----------------------------------------------|
| 189 | <i>MUSK</i>    | Compound heterozygous | c.486+5G>C                           | c.1931T>C p.Val644Ala (exon 15/15)           |
| 190 | <i>MUSK</i>    | Homozygous            | c.221G>A p.Arg74Gln (exon 3/15)      | /                                            |
| 191 | <i>MUSK</i>    | Compound heterozygous | c.1765G>A p.Ala627Pro (exon 13/15)   | c.1879G>C p.Val589Met (exon 14/15)           |
| 192 | <i>RAPSN</i>   | Compound heterozygous | c.264C>A p.Asn88Lys (N88K, exon 2/8) | c.493G>A p.Val165Met (V165M, exon 2/8)       |
| 193 | <i>RAPSN</i>   | Compound heterozygous | c.264C>A p.Asn88Lys (N88K, exon 2/8) | c.1029_c.1045del p.Glu344Cysfs*127 (exon 7)  |
| 194 | <i>RAPSN</i>   | Compound heterozygous | c.264C>A p.Asn88Lys (N88K, exon 2/8) | c.1029_c.1045del p.Glu344Cysfs*127 (exon 7)  |
| 195 | <i>RAPSN</i>   | Compound heterozygous | c.264C>A p.Asn88Lys (N88K, exon 2/8) | Deletion of exons 3 to 7                     |
| 196 | <i>RAPSN</i>   | Compound heterozygous | c.264C>A p.Asn88Lys (N88K, exon 2/8) | c.439G>A p.Glu147Lys (E147K, exon 2/8)       |
| 197 | <i>RAPSN</i>   | Homozygous            | c.264C>A p.Asn88Lys (N88K, exon 2/8) | /                                            |
| 198 | <i>RAPSN</i>   | Compound heterozygous | c.264C>A p.Asn88Lys (N88K, exon 2/8) | c.130del p.Arg44AlafsX20 (exon 1/8)          |
| 199 | <i>RAPSN</i>   | Compound heterozygous | c.264C>A p.Asn88Lys (N88K, exon 2/8) | c.245C>T p.Leu82Pro (L82P, exon 2/8)         |
| 200 | <i>RAPSN</i>   | Compound heterozygous | c.264C>A p.Asn88Lys (N88K, exon 2/8) | c.493G>A p.Val165Met (V165M, exon 2/8)       |
| 201 | <i>RAPSN</i>   | Compound heterozygous | c.133G>A p.Val45Met (V45M, exon 1/8) | c.848T>C p.Leu283Pro (L283P, exon 5/8)       |
| 202 | <i>RAPSN</i>   | Homozygous            | c.264C>A p.Asn88Lys (N88K, exon 2/8) | /                                            |
| 203 | <i>RAPSN</i>   | Homozygous            | c.264C>A p.Asn88Lys (N88K, exon 2/8) | /                                            |
| 204 | <i>RAPSN</i>   | Homozygous            | c.264C>A p.Asn88Lys (N88K, exon 2/8) | /                                            |
| 205 | <i>RAPSN</i>   | Compound heterozygous | c.264C>A p.Asn88Lys (N88K, exon 2/8) | c.491G>A p.Arg164His (R164H, exon 2/8)       |
| 206 | <i>RAPSN</i>   | Homozygous            | c.264C>A p.Asn88Lys (N88K, exon 2/8) | /                                            |
| 207 | <i>RAPSN</i>   | Compound heterozygous | c.264C>A p.Asn88Lys (N88K, exon 2/8) | c.493G>A p.Val165Met (V165M, exon 2/8)       |
| 208 | <i>RAPSN</i>   | Compound heterozygous | c.264C>A p.Asn88Lys (N88K, exon 2/8) | c.439G>A p.Glu147Lys (E147K, exon 2/8)       |
| 209 | <i>RAPSN</i>   | Homozygous            | c.264C>A p.Asn88Lys (N88K, exon 2/8) | /                                            |
| 210 | <i>RAPSN</i>   | Compound heterozygous | c.264C>A p.Asn88Lys (N88K, exon 2/8) | c.1083_1084dupCT p.Tyr362Serfs*10 (exon 7/8) |
| 211 | <i>RAPSN</i>   | Compound heterozygous | c.258C>A p.Tyr86* (Y86X, exon 2/8)   | c.264C>A p.Asn88Lys (N88K, exon 2/8)         |
| 212 | <i>RAPSN</i>   | Homozygous            | c.264C>A p.Asn88Lys (N88K, exon 2/8) | /                                            |
| 213 | <i>RAPSN</i>   | Homozygous            | c.-210A>T                            | /                                            |
| 214 | <i>RAPSN</i>   | Homozygous            | c.264C>A p.Asn88Lys (N88K, exon 2/8) | /                                            |
| 215 | <i>RAPSN</i>   | Homozygous            | c.264C>A p.Asn88Lys (N88K, exon 2/8) | /                                            |
| 216 | <i>RAPSN</i>   | Homozygous            | c.264C>A p.Asn88Lys (N88K, exon 2/8) | /                                            |
| 217 | <i>RAPSN</i>   | Homozygous            | c.264C>A p.Asn88Lys (N88K, exon 2/8) | /                                            |
| 218 | <i>RAPSN</i>   | Homozygous            | c.264C>A p.Asn88Lys (N88K, exon 2/8) | /                                            |
| 219 | <i>RAPSN</i>   | Compound heterozygous | c.264C>A p.Asn88Lys (N88K, exon 2/8) | Deletion of exons 7 and 8                    |
| 220 | <i>RAPSN</i>   | Compound heterozygous | c.264C>A p.Asn88Lys (N88K, exon 2/8) | Deletion of exons 1 and 2                    |
| 221 | <i>RAPSN</i>   | Compound heterozygous | c.264C>A p.Asn88Lys (N88K, exon 2/8) | c.285G>T p.Lys95Asn                          |
| 222 | <i>RAPSN</i>   | Compound heterozygous | c.264C>A p.Asn88Lys (N88K, exon 2/8) | c.691-2A>G                                   |
| 223 | <i>RAPSN</i>   | Compound heterozygous | c.264C>A p.Asn88Lys (N88K, exon 2/8) | c.484 G>A p.Glu162Lys (exon 2/12)            |
| 224 | <i>RAPSN</i>   | Homozygous            | c.264C>A p.Asn88Lys (N88K, exon 2/8) | /                                            |
| 225 | <i>TORIAIP</i> | Homozygous            | c.63dupC p.Arg22Glnfs*88 (exon 1/10) | /                                            |
| 226 | <i>TORIAIP</i> | Compound heterozygous | c.63dupC p.Arg22Glnfs*88 (exon 1/10) | c.72dupC p.Ile25Hisfs*85                     |
| 227 | <i>TORIAIP</i> | Compound heterozygous | c.63dupC p.Arg22Glnfs*88 (exon 1/10) | c.72dupC p.Ile25Hisfs*86                     |
| 228 | <i>COL13A1</i> | Homozygous            | c.294+1G>A p.? (intron 1)            | /                                            |

|     |                     |                       |                                                            |                                                            |
|-----|---------------------|-----------------------|------------------------------------------------------------|------------------------------------------------------------|
| 229 | <i>SCN4A</i>        | Homozygous            | c.4949C>T p.Pro1650Leu (exon 24)                           | /                                                          |
| 230 | <i>LRP4</i>         | Homozygous            | c.1820A>G p.Tyr607Cys (exon 14)                            | /                                                          |
| 231 | <i>SLC5A7</i>       | Compound heterozygous | c.194G>A p.Gly65Glu (exon 3)                               | c.313C>T p.Pro105Ser (exon 4)                              |
| 232 | <i>SLC5A7</i>       | Homozygous            | c.1082G>A p.Arg361Gln (exon 8)                             | /                                                          |
| 233 | <i>CHAT</i>         | Compound heterozygous | c.[205C>A;556C>T] p.[Pro69Thr;Arg186Trp]                   | c.1267G>A p.Asp423Asn                                      |
| 234 | <i>CHAT</i>         | Compound heterozygous | c.[205C>A;556C>T] p.[Pro69Thr;Arg186Trp]                   | c.1267G>A p.Asp423Asn                                      |
| 235 | <i>CHAT/SLC18A3</i> | Compound heterozygous | Deletion encompassing <i>CHAT</i> and <i>SCL18A3</i> genes | c.154G>T p.Val52Phe (V52F, unique exon of <i>SCL18A3</i> ) |

**Supplementary Table 2: Clinical, paraclinical, long-term prognosis and treatment data of *CHRNE*-LE patients**

|                                            | Number of patients (% of patients) | Mean (SD)    |
|--------------------------------------------|------------------------------------|--------------|
| Number of patients                         | 56                                 |              |
| Age at first symptoms (years)              |                                    | 2 (3.5)      |
| Initial phenotype                          |                                    |              |
| Fatigability                               | 53/54 (98.1%)                      |              |
| Proximal weakness                          | 37/56 (66%)                        |              |
| Distal weakness                            | 16/55 (29.1%)                      |              |
| Axial muscle weakness                      | 24/40 (60%)                        |              |
| Ptosis                                     | 53/54 (98.1%)                      |              |
| Ophthalmoparesis                           | 46/54 (85.2%)                      |              |
| Facial weakness                            | 12/53 (22.6%)                      |              |
| Bulbar symptoms                            | 31/54 (57.4%)                      |              |
| Respiratory symptoms                       | 16/54 (29.7%)                      |              |
| Sudden childhood respiratory insufficiency | 13/54 (24.1%)                      |              |
| Scoliosis                                  | 4/54 (7.4%)                        |              |
| Contractures                               | 0/54 (0%)                          |              |
| Arthrogryposis                             | 0/54 (0%)                          |              |
| Intellectual disability                    | 0/54 (0%)                          |              |
| Delayed motor milestones                   | 10/52 (19.2%)                      |              |
| Neonatal hypotonia                         | 8/56 (14.2%)                       |              |
| CK                                         |                                    |              |
| Patients with elevated CK                  | 3/30 (10%)                         |              |
| CK value (U/L)                             |                                    | 136.8 (94.8) |
| ENMG                                       |                                    |              |
| Decrement on 3-Hz RNS                      | 49/51 (96.1%)                      |              |
| Post-exercise increment                    | 0/51 (0%)                          |              |
| R-CMAP                                     | 1/51 (2.0%)                        |              |
| Muscle biopsy                              |                                    |              |
| Normal                                     | 0/16 (6.3%)                        |              |
| Type I fibre predominance                  | 9/16 (56.2%)                       |              |
| Type II fibre atrophy                      | 12/16 (75%)                        |              |
| Fibre size disproportion                   | 3/16 (18.8%)                       |              |
| Nuclear internalizations                   | 1/16 (6.3%)                        |              |
| Lipid surcharge                            | 1/16 (6.3%)                        |              |
| Mitochondrial abnormalities                | 2/16 (12.5%)                       |              |
| Core-like lesions                          | 0/16 (0%)                          |              |
| Tubular aggregates                         | 0/16 (0%)                          |              |
| Necrotic/regenerating fibres               | 0/16 (0%)                          |              |
| Abnormal NMJ on electron microscopy        | 5/5 (100%)                         |              |
| Long-term prognosis                        |                                    |              |
| Exacerbations                              | 15/56 (26.8%)                      |              |
| ICU admissions                             | 8/56 (14.2%)                       |              |
| Respiratory assistance                     | 4/56 (7.1%)                        |              |
| Wheelchair-bound                           | 3/56 (5.3%)                        |              |
| Both ventilated and wheelchair-bound       | 1/56 (1.8%)                        |              |
| MGFA score $\geq 4$                        | 5/56 (8.9%)                        |              |
| Improvement with treatment                 |                                    |              |
| AChE inhibitors                            | 46/53 (86.8%)                      |              |
| 3,4-DAP                                    | 23/33 (69.7%)                      |              |
| Salbutamol                                 | 12/16 (75%)                        |              |
| Ephedrine                                  | NA                                 |              |
| Fluoxetine                                 | NA                                 |              |
| Quinidine                                  | NA                                 |              |

LE = low-expressor, CK = creatine kinase, ENMG = electroneuromyography, RNS = repetitive nerve stimulation, R-CMAP: repetitive compound muscle action potential, NMJ = neuromuscular junction, ICU = intensive care unit, MGFA = Myasthenia Gravis Foundation of America, AChE = acetylcholine esterase, 3,4-DAP = 3,4-diaminopyridine, NA = not available



**Supplementary Table 3: Clinical, paraclinical, long-term prognosis and treatment data of FCCMS patients**

|                                            | Number of patients (% of patients) | Mean (SD)   |
|--------------------------------------------|------------------------------------|-------------|
| Number of patients                         | 4                                  |             |
| Age at first symptoms (years)              |                                    | 3.25 (1.64) |
| Initial phenotype                          |                                    |             |
| Fatigability                               | 3/3 (100%)                         |             |
| Proximal weakness                          | 2/4 (50%)                          |             |
| Distal weakness                            | 0/4 (0%)                           |             |
| Axial muscle weakness                      | 2/3 (66.7%)                        |             |
| Ptosis                                     | 4/4 (100%)                         |             |
| Ophthalmospasms                            | 4/4 (100%)                         |             |
| Facial weakness                            | 0/4 (0%)                           |             |
| Bulbar symptoms                            | 1/3 (33.3%)                        |             |
| Respiratory symptoms                       | 0/3 (0%)                           |             |
| Sudden childhood respiratory insufficiency | 0/3 (0%)                           |             |
| Scoliosis                                  | 1/4 (25%)                          |             |
| Contractures                               | 0/4 (0%)                           |             |
| Arthrogryposis                             | 0/4 (0%)                           |             |
| Intellectual disability                    | 0/4 (0%)                           |             |
| Delayed motor milestones                   | 0/4 (0%)                           |             |
| Neonatal hypotonia                         | 0/4 (0%)                           |             |
| CK                                         |                                    |             |
| Patients with elevated CK                  | 1/1 (100%)                         |             |
| CK value (U/L)                             |                                    | 366*        |
| ENMG                                       |                                    |             |
| Decrement on 3-Hz RNS                      | 4/4 (100%)                         |             |
| Post-exercise increment                    | 0/4 (0%)                           |             |
| R-CMAP                                     | 1/4 (25%)                          |             |
| Muscle biopsy**                            |                                    |             |
| Normal                                     | NA                                 |             |
| Type I fibre predominance                  | NA                                 |             |
| Type II fibre atrophy                      | NA                                 |             |
| Fibre size disproportion                   | NA                                 |             |
| Nuclear internalizations                   | NA                                 |             |
| Lipid surcharge                            | NA                                 |             |
| Mitochondrial abnormalities                | NA                                 |             |
| Core-like lesions                          | NA                                 |             |
| Tubular aggregates                         | NA                                 |             |
| Necrotic/regenerating fibres               | NA                                 |             |
| Abnormal NMJ on electron microscopy        | NA                                 |             |
| Long-term prognosis                        |                                    |             |
| Exacerbations                              | 0/4 (0%)                           |             |
| ICU admissions                             | 0/4 (0%)                           |             |
| Respiratory assistance                     | 0/4 (0%)                           |             |
| Wheelchair-bound                           | 0/4 (0%)                           |             |
| Both ventilated and wheelchair-bound       | 0/4 (0%)                           |             |
| MGFA score $\geq 4$                        | 0/4 (0%)                           |             |
| Improvement with treatment                 |                                    |             |
| AChE inhibitors                            | 4/4 (100%)                         |             |
| 3,4-DAP                                    | 1/2 (50%)                          |             |
| Salbutamol                                 | 1/2 (50%)                          |             |
| Ephedrine                                  | 1/1 (100%)                         |             |
| Fluoxetine                                 | 0/1 (0%)                           |             |
| Quinidine                                  | NA                                 |             |

FCCMS = fast-channel congenital myasthenic syndrome, CK = creatine kinase, ENMG = electroneuromyography, RNS = repetitive nerve stimulation, R-CMAP = repetitive compound muscle action potential, NMJ = neuromuscular junction, ICU = intensive care unit, MGFA = Myasthenia Gravis Foundation of America, AChE = acetylcholine esterase, 3,4-DAP = 3,4-diaminopyridine, NA = not available

\* Only one patient had an available CK value

\*\* No muscle biopsy was performed

**Supplementary Table 4: Clinical, paraclinical, long-term prognosis and treatment data of *CHRND* patients**

|                                            | Number of patients (% of patients) | Mean (SD)   |
|--------------------------------------------|------------------------------------|-------------|
| Number of patients                         | 4                                  |             |
| Age at first symptoms (years)              |                                    | 10.3 (11.8) |
| Initial phenotype                          |                                    |             |
| Fatigability                               | 3/4 (75%)                          |             |
| Proximal weakness                          | 2/4 (50%)                          |             |
| Distal weakness                            | 1/4 (25%)                          |             |
| Axial muscle weakness                      | 1/3 (33.3%)                        |             |
| Ptosis                                     | 4/4 (100%)                         |             |
| Ophthalmoparesis                           | 2/4 (50%)                          |             |
| Facial weakness                            | 1/4 (25%)                          |             |
| Bulbar symptoms                            | 2/4 (50%)                          |             |
| Respiratory symptoms                       | 2/4 (50%)                          |             |
| Sudden childhood respiratory insufficiency | 0/4 (0%)                           |             |
| Scoliosis                                  | 1/4 (25%)                          |             |
| Contractures                               | 0/4 (0%)                           |             |
| Arthrogryposis                             | 0/4 (0%)                           |             |
| Intellectual disability                    | 0/4 (0%)                           |             |
| Delayed motor milestones                   | 0/4 (0%)                           |             |
| Neonatal hypotonia                         | 1/4 (25%)                          |             |
| CK                                         |                                    |             |
| Patients with elevated CK                  | 1/1 (100%)                         |             |
| CK value (U/L)                             |                                    | 218*        |
| ENMG                                       |                                    |             |
| Decrement on 3-Hz RNS                      | 4/4 (100%)                         |             |
| Post-exercise increment                    | 0/4 (0%)                           |             |
| R-CMAP                                     | 0/4 (0%)                           |             |
| Muscle biopsy                              |                                    |             |
| Normal                                     | 2/2 (50%)                          |             |
| Type I fibre predominance                  | 0/2 (0%)                           |             |
| Type II fibre atrophy                      | 0/2 (0%)                           |             |
| Fibre size disproportion                   | 0/2 (0%)                           |             |
| Nuclear internalizations                   | 0/2 (0%)                           |             |
| Lipid surcharge                            | 0/2 (0%)                           |             |
| Mitochondrial abnormalities                | 0/2 (0%)                           |             |
| Core-like lesions                          | 0/2 (0%)                           |             |
| Tubular aggregates                         | 0/2 (0%)                           |             |
| Necrotic/regenerating fibres               | 0/2 (0%)                           |             |
| Abnormal NMJ on electron microscopy        | NA                                 |             |
| Long-term prognosis                        |                                    |             |
| Exacerbations                              | 0/4 (0%)                           |             |
| ICU admissions                             | 0/4 (0%)                           |             |
| Respiratory assistance                     | 0/4 (0%)                           |             |
| Wheelchair-bound                           | 0/4 (0%)                           |             |
| Both ventilated and wheelchair-bound       | 0/4 (0%)                           |             |
| MGFA score $\geq$ 4                        | 0/4 (0%)                           |             |
| Improvement with treatment                 |                                    |             |
| AChE inhibitors                            | 3/4 (75%)                          |             |
| 3,4-DAP                                    | 3/3 (100%)                         |             |
| Salbutamol                                 | 1/1 (100%)                         |             |
| Ephedrine                                  | 0/1 (0%)                           |             |
| Fluoxetine                                 | NA                                 |             |
| Quinidine                                  | NA                                 |             |

CK = creatine kinase, ENMG = electroneuromyography, RNS = repetitive nerve stimulation, R-CMAP = repetitive compound muscle action potential, NMJ = neuromuscular junction, ICU = intensive care unit, MGFA = Myasthenia Gravis Foundation of America, AChE = acetylcholine esterase, 3,4-DAP = 3,4-diaminopyridine, NA = not available

\* Only one patient had an available CK value

**Supplementary Table 5: Clinical, paraclinical, long-term prognosis and treatment data of SCCMS patients**

|                                            | Number of patients (% of patients) | Mean (SD)     |
|--------------------------------------------|------------------------------------|---------------|
| Number of patients                         | 20                                 |               |
| Age at first symptoms (years)              |                                    | 14.4 (14.7)   |
| Initial phenotype                          |                                    |               |
| Fatigability                               | 17/20 (85%)                        |               |
| Proximal weakness                          | 4/20 (20%)                         |               |
| Distal weakness                            | 16/20 (80%)                        |               |
| Axial muscle weakness                      | 7/19 (36.8%)                       |               |
| Ptosis                                     | 12/10 (6%)                         |               |
| Ophthalmoparesis                           | 8/20 (4%)                          |               |
| Facial weakness                            | 2/20 (10%)                         |               |
| Bulbar symptoms                            | 3/20 (15%)                         |               |
| Respiratory symptoms                       | 5/20 (25%)                         |               |
| Sudden childhood respiratory insufficiency | 2/20 (10%)                         |               |
| Scoliosis                                  | 4/20 (20%)                         |               |
| Contractures                               | 0/20 (0%)                          |               |
| Arthrogryposis                             | 0/20 (0%)                          |               |
| Intellectual disability                    | 0/20 (0%)                          |               |
| Delayed motor milestones                   | 2/18 (11.1%)                       |               |
| Neonatal hypotonia                         | 0/20 (0%)                          |               |
| CK                                         |                                    |               |
| Patients with elevated CK                  | 1/6 (16.7%)                        |               |
| CK value (U/L)                             |                                    | 163.7 (115.3) |
| ENMG                                       |                                    |               |
| Decrement on 3-Hz RNS                      | 17/17 (100%)                       |               |
| Post-exercise increment                    | 0/17 (0%)                          |               |
| R-CMAP                                     | 15/20 (75%)                        |               |
| Muscle biopsy                              |                                    |               |
| Normal                                     | 1/2 (50%)                          |               |
| Type I fibre predominance                  | 1/2 (50%)                          |               |
| Type II fibre atrophy                      | 0/2 (50%)                          |               |
| Fibre size disproportion                   | 0/2 (50%)                          |               |
| Nuclear internalizations                   | 0/2 (50%)                          |               |
| Lipid surcharge                            | 0/2 (50%)                          |               |
| Mitochondrial abnormalities                | 0/2 (50%)                          |               |
| Core-like lesions                          | 0/2 (50%)                          |               |
| Tubular aggregates                         | 0/2 (50%)                          |               |
| Necrotic/regenerating fibres               | 0/2 (50%)                          |               |
| Abnormal NMJ on electron microscopy        | NA                                 |               |
| Long-term prognosis                        |                                    |               |
| Exacerbations                              | 6/20 (30%)                         |               |
| ICU admissions                             | 4/20 (20%)                         |               |
| Respiratory assistance                     | 11/20 (55%)                        |               |
| Wheelchair-bound                           | 2/20 (10%)                         |               |
| Both ventilated and wheelchair-bound       | 2/20 (10%)                         |               |
| MGFA score $\geq 4$                        | 2/19 (10.5%)                       |               |
| Improvement with treatment                 |                                    |               |
| AChE inhibitors                            | 0/5 (0%)                           |               |
| 3,4-DAP                                    | 1/2 (50%)                          |               |
| Salbutamol                                 | 2/5 (40%)                          |               |
| Ephedrine                                  | NA                                 |               |
| Fluoxetine                                 | 7/13 (53.8%)                       |               |
| Quinidine                                  | 5/5 (100%)                         |               |

SCCMS = slow-channel congenital myasthenic syndrome, CK = creatine kinase, ENMG = electroneuromyography, RNS = repetitive nerve stimulation, R-CMAP = repetitive compound muscle action potential, NMJ = neuromuscular junction, ICU = intensive care unit, MGFA = Myasthenia Gravis Foundation of America, AChE = acetylcholine esterase, 3,4-DAP = 3,4-diaminopyridine, NA = not available

**Supplementary Table 6: Clinical, paraclinical, long-term prognosis and treatment data of MUSK patients**

|                                            | Number of patients (% of patients) | Mean (SD)       |
|--------------------------------------------|------------------------------------|-----------------|
| Number of patients                         | 8                                  |                 |
| Age at first symptoms (years)              |                                    | 5.8 (13.8)      |
| Initial phenotype                          |                                    |                 |
| Fatigability                               | 6/8 (75%)                          |                 |
| Proximal weakness                          | 4/8 (50%)                          |                 |
| Distal weakness                            | 0/8 (0%)                           |                 |
| Axial muscle weakness                      | 2/7 (28.6%)                        |                 |
| Ptosis                                     | 5/8 (62.5%)                        |                 |
| Ophthalmoparesis                           | 4/8 (50%)                          |                 |
| Facial weakness                            | 1/8 (12.5%)                        |                 |
| Bulbar symptoms                            | 5/8 (62.5%)                        |                 |
| Respiratory symptoms                       | 5/8 (62.5%)                        |                 |
| Sudden childhood respiratory insufficiency | 4/8 (50%)                          |                 |
| Scoliosis                                  | 1/8 (12.5%)                        |                 |
| Contractures                               | 0/8 (0%)                           |                 |
| Arthrogryposis                             | 0/8 (0%)                           |                 |
| Intellectual disability                    | 0/8 (0%)                           |                 |
| Delayed motor milestones                   | 2/8 (25%)                          |                 |
| Neonatal hypotonia                         | 2/8 (25%)                          |                 |
| CK                                         |                                    |                 |
| Patients with elevated CK                  | 3/3 (100%)                         |                 |
| CK value (U/L)                             |                                    | 1822.7 (2371.7) |
| ENMG                                       |                                    |                 |
| Decrement on 3-Hz RNS                      | 7/8 (87.5)                         |                 |
| Post-exercise increment                    | 0/8 (0%)                           |                 |
| R-CMAP                                     | 0/8 (0%)                           |                 |
| Muscle biopsy                              |                                    |                 |
| Normal                                     | 0/3 (0%)                           |                 |
| Type I fibre predominance                  | 1/3 (33.3%)                        |                 |
| Type II fibre atrophy                      | 0/3 (0%)                           |                 |
| Fibre size disproportion                   | 0/3 (0%)                           |                 |
| Nuclear internalizations                   | 1/3 (0%)                           |                 |
| Lipid surcharge                            | 1/3 (33.3%)                        |                 |
| Mitochondrial abnormalities                | 0/3 (0%)                           |                 |
| Core-like lesions                          | 0/3 (0%)                           |                 |
| Tubular aggregates                         | 0/3 (0%)                           |                 |
| Necrotic/regenerating fibres               | 1/3 (33.3%)                        |                 |
| Abnormal NMJ on electron microscopy        | 1/1 (100%)                         |                 |
| Long-term prognosis                        |                                    |                 |
| Exacerbations                              | 2/8 (25%)                          |                 |
| ICU admissions                             | 4/8 (50%)                          |                 |
| Respiratory assistance                     | 2/8 (25%)                          |                 |
| Wheelchair-bound                           | 1/8 (12.5%)                        |                 |
| Both ventilated and wheelchair-bound       | 0/8 (0%)                           |                 |
| MGFA score $\geq 4$                        | 1/8 (12.5%)                        |                 |
| Improvement with treatment                 |                                    |                 |
| AChE inhibitors                            | 1/5 (20%)                          |                 |
| 3,4-DAP                                    | 1/4 (25%)                          |                 |
| Salbutamol                                 | 4/5 (80%)                          |                 |
| Ephedrine                                  | NA                                 |                 |
| Fluoxetine                                 | NA                                 |                 |
| Quinidine                                  | NA                                 |                 |

CK = creatine kinase, ENMG = electroneuromyography, RNS = repetitive nerve stimulation, R-CMAP = repetitive compound muscle action potential, NMJ = neuromuscular junction, ICU = intensive care unit, MGFA = Myasthenia Gravis Foundation of America, AChE = acetylcholine esterase, 3,4-DAP = 3,4-diaminopyridine, NA = not available

**Supplementary Table 7: Clinical, paraclinical, long-term prognosis and treatment data of AGRN patients**

|                                            | Number of patients (% of patients) | Mean (SD)   |
|--------------------------------------------|------------------------------------|-------------|
| Number of patients                         | 12                                 |             |
| Age at first symptoms (years)              |                                    | 14.8 (12.8) |
| Initial phenotype                          |                                    |             |
| Fatigability                               | 11/12 (91.7%)                      |             |
| Proximal weakness                          | 6/12 (50%)                         |             |
| Distal weakness                            | 4/12 (33.3%)                       |             |
| Axial muscle weakness                      | 2/12 (16.7%)                       |             |
| Ptosis                                     | 2/12 (16.7%)                       |             |
| Ophthalmoparesis                           | 1/12 (8.3%)                        |             |
| Facial weakness                            | 4/12 (33.3%)                       |             |
| Bulbar symptoms                            | 3/12 (25%)                         |             |
| Respiratory symptoms                       | 5/12 (41.7%)                       |             |
| Sudden childhood respiratory insufficiency | 2/12 (16.7%)                       |             |
| Scoliosis                                  | 1/12 (8.3%)                        |             |
| Contractures                               | 1/12 (8.3%)                        |             |
| Arthrogryposis                             | 0/12 (0%)                          |             |
| Intellectual disability                    | 0/12 (0%)                          |             |
| Delayed motor milestones                   | 0/12 (0%)                          |             |
| Neonatal hypotonia                         | 0/12 (0%)                          |             |
| CK                                         |                                    |             |
| Patients with elevated CK                  | 3/9 (33.3%)                        |             |
| CK value (U/L)                             |                                    | 191 (135.1) |
| ENMG                                       |                                    |             |
| Decrement on 3-Hz RNS                      | 12/12 (100%)                       |             |
| Post-exercise increment                    | 3/12 (25%)                         |             |
| R-CMAP                                     | 0/12 (0%)                          |             |
| Muscle biopsy                              |                                    |             |
| Normal                                     | 0/6 (0%)                           |             |
| Type I fibre predominance                  | 4/6 (66.7%)                        |             |
| Type II fibre atrophy                      | 4/6 (66.7%)                        |             |
| Fibre size disproportion                   | 2/6 (33.3%)                        |             |
| Nuclear internalizations                   | 1/6 (16.7%)                        |             |
| Lipid surcharge                            | 1/6 (16.7%)                        |             |
| Mitochondrial abnormalities                | 0/6 (0%)                           |             |
| Core-like lesions                          | 0/6 (0%)                           |             |
| Tubular aggregates                         | 0/6 (0%)                           |             |
| Necrotic/regenerating fibres               | 0/6 (0%)                           |             |
| Abnormal NMJ on electron microscopy        | NA                                 |             |
| Long-term prognosis                        |                                    |             |
| Exacerbations                              | 3/12 (25%)                         |             |
| ICU admissions                             | 3/12 (25%)                         |             |
| Respiratory assistance                     | 3/12 (25%)                         |             |
| Wheelchair-bound                           | 1/12 (8.3%)                        |             |
| Both ventilated and wheelchair-bound       | 1/12 (8.3%)                        |             |
| MGFA score $\geq 4$                        | 1/12 (8.3%)                        |             |
| Improvement with treatment                 |                                    |             |
| AChE inhibitors                            | 1/10 (10%)                         |             |
| 3,4-DAP                                    | 0/7 (0%)                           |             |
| Salbutamol                                 | 5/6 (83.3%)                        |             |
| Ephedrine                                  | 5/7 (71.4%)                        |             |
| Fluoxetine                                 | 0/1 (0%)                           |             |
| Quinidine                                  | NA                                 |             |

CK = creatine kinase, ENMG = electroneuromyography, RNS = repetitive nerve stimulation, R-CMAP = repetitive compound muscle action potential, NMJ = neuromuscular junction, ICU = intensive care unit, MGFA = Myasthenia Gravis Foundation of America, AChE = acetylcholine esterase, 3,4-DAP = 3,4-diaminopyridine, NA = not available

**Supplementary Table 8: Clinical, paraclinical, long-term prognosis and treatment data of RAPSN patients**

|                                            | Number of patients (% of patients) | Mean (SD)    |
|--------------------------------------------|------------------------------------|--------------|
| Number of patients                         | 33                                 |              |
| Age at first symptoms (years)              |                                    | 7.2 (16.1)   |
| Initial phenotype                          |                                    |              |
| Fatigability                               | 27/29 (93.1%)                      |              |
| Proximal weakness                          | 25/33 (75.8%)                      |              |
| Distal weakness                            | 10/31 (32.2%)                      |              |
| Axial muscle weakness                      | 23/31 (74.2%)                      |              |
| Ptosis                                     | 17/30 (56.7%)                      |              |
| Ophthalmoparesis                           | 13/30 (43.3%)                      |              |
| Facial weakness                            | 11/32 (34.3%)                      |              |
| Bulbar symptoms                            | 16/32 (50%)                        |              |
| Respiratory symptoms                       | 16/32 (50%)                        |              |
| Sudden childhood respiratory insufficiency | 15/32 (46.9%)                      |              |
| Scoliosis                                  | 12/32 (37.5%)                      |              |
| Contractures                               | 9/32 (28.1%)                       |              |
| Arthrogryposis                             | 7/32 (21.9%)                       |              |
| Intellectual disability                    | 0/32 (0%)                          |              |
| Delayed motor milestones                   | 6/30 (20%)                         |              |
| Neonatal hypotonia                         | 11/33 (33.3%)                      |              |
| CK                                         |                                    |              |
| Patients with elevated CK                  | 1/19 (5.2%)                        |              |
| CK value (U/L)                             |                                    | 105.8 (86.0) |
| ENMG                                       |                                    |              |
| Decrement on 3-Hz RNS                      | 29/31 (93.5%)                      |              |
| Post-exercise increment                    | 0/29 (0%)                          |              |
| R-CMAP                                     | 2/29 (6.9%)                        |              |
| Muscle biopsy                              |                                    |              |
| Normal                                     | 4/11 (36.4%)                       |              |
| Type I fibre predominance                  | 2/11 (18.2%)                       |              |
| Type II fibre atrophy                      | 0/11 (0%)                          |              |
| Fibre size disproportion                   | 2/11 (18.2%)                       |              |
| Nuclear internalizations                   | 0/11 (0%)                          |              |
| Lipid surcharge                            | 3/11 (27.3%)                       |              |
| Mitochondrial abnormalities                | 1/11 (9.1%)                        |              |
| Core-like lesions                          | 1/11 (9.1%)                        |              |
| Tubular aggregates                         | 0/11 (0%)                          |              |
| Necrotic/regenerating fibres               | 0/11 (0%)                          |              |
| Abnormal NMJ on electron microscopy        | 1/1 (100%)                         |              |
| Long-term prognosis                        |                                    |              |
| Exacerbations                              | 11/33 (33.3%)                      |              |
| ICU admissions                             | 17/31 (54.8%)                      |              |
| Respiratory assistance                     | 3/33 (9.1%)                        |              |
| Wheelchair-bound                           | 2/33 (6.1%)                        |              |
| Both ventilated and wheelchair-bound       | 2/33 (6.1%)                        |              |
| MGFA score $\geq 4$                        | 1/33 (3.0%)                        |              |
| Improvement with treatment                 |                                    |              |
| AChE inhibitors                            | 28/30 (9.3%)                       |              |
| 3,4-DAP                                    | 11/15 (73.3%)                      |              |
| Salbutamol                                 | 4/5 (80%)                          |              |
| Ephedrine                                  | 0/1 (0%)                           |              |
| Fluoxetine                                 | 0/3 (0%)                           |              |
| Quinidine                                  | NA                                 |              |

CK = creatine kinase, ENMG = electroneuromyography, RNS = repetitive nerve stimulation, R-CMAP = repetitive compound muscle action potential, NMJ = neuromuscular junction, ICU = intensive care unit, MGFA = Myasthenia Gravis Foundation of America, AChE = acetylcholine esterase, 3,4-DAP = 3,4-diaminopyridine, NA = not available

**Supplementary Table 9: Clinical, paraclinical, long-term prognosis and treatment data of COLQ patients**

|                                            | Number of patients (% of patients) | Mean (SD)   |
|--------------------------------------------|------------------------------------|-------------|
| Number of patients                         | 19                                 |             |
| Age at first symptoms (years)              |                                    | 6.7 (8.4)   |
| Initial phenotype                          |                                    |             |
| Fatigability                               | 19/19 (100%)                       |             |
| Proximal weakness                          | 18/19 (94.7%)                      |             |
| Distal weakness                            | 5/18 (27.8%)                       |             |
| Axial muscle weakness                      | 10/15 (66.7%)                      |             |
| Ptosis                                     | 4/19 (21.1%)                       |             |
| Ophthalmoparesis                           | 1/19 (5.2%)                        |             |
| Facial weakness                            | 1/19 (5.2%)                        |             |
| Bulbar symptoms                            | 2/19 (10.5%)                       |             |
| Respiratory symptoms                       | 2/19 (10.5%)                       |             |
| Sudden childhood respiratory insufficiency | 2/19 (10.5%)                       |             |
| Scoliosis                                  | 7/18 (38.9%)                       |             |
| Contractures                               | 2/19 (10.5%)                       |             |
| Arthrogryposis                             | 0/19 (0%)                          |             |
| Intellectual disability                    | 0/19 (0%)                          |             |
| Delayed motor milestones                   | 3/18 (16.7%)                       |             |
| Neonatal hypotonia                         | 5/19 (26.3%)                       |             |
| CK                                         |                                    |             |
| Patients with elevated CK                  | 1/12 (8.3%)                        |             |
| CK value (U/L)                             |                                    | 93.1 (57.5) |
| ENMG                                       |                                    |             |
| Decrement on 3-Hz RNS                      | 19/19 (100%)                       |             |
| Post-exercise increment                    | 0/18 (0%)                          |             |
| R-CMAP                                     | 15/19 (78.9%)                      |             |
| Muscle biopsy                              |                                    |             |
| Normal                                     | 3/16 (18.8%)                       |             |
| Type I fibre predominance                  | 7/16 (43.8%)                       |             |
| Type II fibre atrophy                      | 3/16 (18.8%)                       |             |
| Fibre size disproportion                   | 2/16 (12.5%)                       |             |
| Nuclear internalizations                   | 2/16 (12.5%)                       |             |
| Lipid surcharge                            | 2/16 (12.5%)                       |             |
| Mitochondrial abnormalities                | 0/16 (0%)                          |             |
| Core-like lesions                          | 0/16 (0%)                          |             |
| Tubular aggregates                         | 0/16 (0%)                          |             |
| Necrotic/regenerating fibres               | 1/16 (6.3%)                        |             |
| Abnormal NMJ on electron microscopy        | 1/1 (100%)                         |             |
| Long-term prognosis                        |                                    |             |
| Exacerbations                              | 5/19 (26.3%)                       |             |
| ICU admissions                             | 2/19 (10.5%)                       |             |
| Respiratory assistance                     | 3/19 (15.8%)                       |             |
| Wheelchair-bound                           | 2/19 (10.5%)                       |             |
| Both ventilated and wheelchair-bound       | 1/19 (5.3%)                        |             |
| MGFA score $\geq 4$                        | 1/19 (5.3%)                        |             |
| Improvement with treatment                 |                                    |             |
| AChE inhibitors                            | 0/7 (0%)                           |             |
| 3,4-DAP                                    | 3/6 (50%)                          |             |
| Salbutamol                                 | 8/10 (80%)                         |             |
| Ephedrine                                  | 7/8 (87.5%)                        |             |
| Fluoxetine                                 | NA                                 |             |
| Quinidine                                  | NA                                 |             |

CK = creatine kinase, ENMG = electroneuromyography, RNS = repetitive nerve stimulation, R-CMAP = repetitive compound muscle action potential, NMJ = neuromuscular junction, ICU = intensive care unit, MGFA = Myasthenia Gravis Foundation of America, AChE = acetylcholine esterase, 3,4-DAP = 3,4-diaminopyridine, NA = not available

**Supplementary Table 10: Clinical, paraclinical, long-term prognosis and treatment data of DOK7 patients**

|                                            | Number of patients (% of patients) | Mean (SD)     |
|--------------------------------------------|------------------------------------|---------------|
| Number of patients                         | 44                                 |               |
| Age at first symptoms (years)              |                                    | 7.2 (11.4)    |
| Initial phenotype                          |                                    |               |
| Fatigability                               | 33/40 (82.5%)                      |               |
| Proximal weakness                          | 40/44 (90.9%)                      |               |
| Distal weakness                            | 5/41 (12.2%)                       |               |
| Axial muscle weakness                      | 14/31 (45.2%)                      |               |
| Ptosis                                     | 22/44 (50%)                        |               |
| Ophthalmoparesis                           | 3/44 (6.8%)                        |               |
| Facial weakness                            | 10/41 (24.4%)                      |               |
| Bulbar symptoms                            | 13/44 (29.5%)                      |               |
| Respiratory symptoms                       | 15/44 (34.1%)                      |               |
| Sudden childhood respiratory insufficiency | 9/44 (20.5%)                       |               |
| Scoliosis                                  | 23/44 (52.2%)                      |               |
| Contractures                               | 5/42 (11.9%)                       |               |
| Arthrogryposis                             | 0/44 (0%)                          |               |
| Intellectual disability                    | 0/44 (0%)                          |               |
| Delayed motor milestones                   | 11/43 (25.6%)                      |               |
| Neonatal hypotonia                         | 8/44 (18.2%)                       |               |
| CK                                         |                                    |               |
| Patients with elevated CK                  | 7/28 (25%)                         |               |
| CK value (U/L)                             |                                    | 187.7 (181.3) |
| ENMG                                       |                                    |               |
| Decrement on 3-Hz RNS                      | 39/41 (95.1%)                      |               |
| Post-exercise increment                    | 0/40 (0%)                          |               |
| R-CMAP                                     | 0/42 (0%)                          |               |
| Muscle biopsy                              |                                    |               |
| Normal                                     | 3/27 (11.1%)                       |               |
| Type I fibre predominance                  | 14/27 (51.9%)                      |               |
| Type II fibre atrophy                      | 10/27 (37.0%)                      |               |
| Fibre size disproportion                   | 8/27 (29.6%)                       |               |
| Nuclear internalizations                   | 1/27 (3.7%)                        |               |
| Lipid surcharge                            | 4/27 (14.8%)                       |               |
| Mitochondrial abnormalities                | 1/27 (3.7%)                        |               |
| Core-like lesions                          | 3/27 (11.1%)                       |               |
| Tubular aggregates                         | 0/27 (0%)                          |               |
| Necrotic/regenerating fibres               | 0/27 (0%)                          |               |
| Abnormal NMJ on electron microscopy        | 1/2 (50%)                          |               |
| Long-term prognosis                        |                                    |               |
| Exacerbations                              | 15/44 (34.1%)                      |               |
| ICU admissions                             | 17/44 (38.6%)                      |               |
| Respiratory assistance                     | 16/44 (36.3%)                      |               |
| Wheelchair-bound                           | 16/44 (36.3%)                      |               |
| Both ventilated and wheelchair-bound       | 9/44 (20.5%)                       |               |
| MGFA score $\geq 4$                        | 12/44 (27.2%)                      |               |
| Improvement with treatment                 |                                    |               |
| AChE inhibitors                            | 0/23 (0%)                          |               |
| 3,4-DAP                                    | 23/33 (69.7%)                      |               |
| Salbutamol                                 | 20/22 (90.9%)                      |               |
| Ephedrine                                  | 22/23 (95.7%)                      |               |
| Fluoxetine                                 | NA                                 |               |
| Quinidine                                  | NA                                 |               |

CK = creatine kinase, ENMG = electroneuromyography, RNS = repetitive nerve stimulation, R-CMAP = repetitive compound muscle action potential, NMJ = neuromuscular junction, ICU = intensive care unit, MGFA = Myasthenia Gravis Foundation of America, AChE = acetylcholine esterase, 3,4-DAP = 3,4-diaminopyridine, NA = not available



**Supplementary Table 11: Clinical, paraclinical, long-term prognosis and treatment data of GFPT1 patients**

|                                            | Number of patients (% of patients) | Mean (SD)     |
|--------------------------------------------|------------------------------------|---------------|
| Number of patients                         | 15                                 |               |
| Age at first symptoms (years)              |                                    | 6.1 (6.2)     |
| Initial phenotype                          |                                    |               |
| Fatigability                               | 15/15 (100%)                       |               |
| Proximal weakness                          | 15/15 (100%)                       |               |
| Distal weakness                            | 1/14 (7.1%)                        |               |
| Axial muscle weakness                      | 6/6 (100%)                         |               |
| Ptosis                                     | 2/15 (13.3%)                       |               |
| Ophthalmoparesis                           | 1/15 (6.7%)                        |               |
| Facial weakness                            | 0/15 (0%)                          |               |
| Bulbar symptoms                            | 0/15 (0%)                          |               |
| Respiratory symptoms                       | 1/15 (6.7%)                        |               |
| Sudden childhood respiratory insufficiency | 0/15 (0%)                          |               |
| Scoliosis                                  | 2/15 (13.3%)                       |               |
| Contractures                               | 2/15 (13.3%)                       |               |
| Arthrogryposis                             | 0/15 (0%)                          |               |
| Intellectual disability                    | 0/15 (0%)                          |               |
| Delayed motor milestones                   | 1/14 (7.1%)                        |               |
| Neonatal hypotonia                         | 0/15 (0%)                          |               |
| CK                                         |                                    |               |
| Patients with elevated CK                  | 7/12 (58.3%)                       |               |
| CK value (U/L)                             |                                    | 311.5 (238.0) |
| ENMG                                       |                                    |               |
| Decrement on 3-Hz RNS                      | 13/13 (100%)                       |               |
| Post-exercise increment                    | 0/14 (0%)                          |               |
| R-CMAP                                     | 0/14 (0%)                          |               |
| Muscle biopsy                              |                                    |               |
| Normal                                     | 0/9                                |               |
| Type I fibre predominance                  | 1/9 (11.1%)                        |               |
| Type II fibre atrophy                      | 1/9 (11.1%)                        |               |
| Fibre size disproportion                   | 2/9 (22.2%)                        |               |
| Nuclear internalizations                   | 2/9 (22.2%)                        |               |
| Lipid surcharge                            | 1/9 (11.1%)                        |               |
| Mitochondrial abnormalities                | 0/9 (0%)                           |               |
| Core-like lesions                          | 0/9 (0%)                           |               |
| Tubular aggregates                         | 7/9 (77.8%)                        |               |
| Necrotic/regenerating fibres               | 0/9 (0%)                           |               |
| Abnormal NMJ on electron microscopy        | 2/3 (66.7%)                        |               |
| Long-term prognosis                        |                                    |               |
| Exacerbations                              | 1/15 (6.7%)                        |               |
| ICU admissions                             | 0/15 (0%)                          |               |
| Respiratory assistance                     | 2/15 (13.3%)                       |               |
| Wheelchair-bound                           | 3/15 (20%)                         |               |
| Both ventilated and wheelchair-bound       | 1/15 (6.7%)                        |               |
| MGFA score $\geq 4$                        | 2/15 (13.3%)                       |               |
| Improvement with treatment                 |                                    |               |
| AChE inhibitors                            | 13/14 (92.9%)                      |               |
| 3,4-DAP                                    | 10/11 (90.9%)                      |               |
| Salbutamol                                 | 6/7 (85.7%)                        |               |
| Ephedrine                                  | 3/3 (100%)                         |               |
| Fluoxetine                                 | NA                                 |               |
| Quinidine                                  | NA                                 |               |

CK = creatine kinase, ENMG = electroneuromyography, RNS = repetitive nerve stimulation, R-CMAP = repetitive compound muscle action potential, NMJ = neuromuscular junction, ICU = intensive care unit, MGFA = Myasthenia Gravis Foundation of America, AChE = acetylcholine esterase, 3,4-DAP = 3,4-diaminopyridine, NA = not available

**Supplementary Table 12: Clinical, paraclinical, long-term prognosis and treatment data of *GMPPB* patients**

|                                            | Number of patients (% of patients) | Mean (SD)       |
|--------------------------------------------|------------------------------------|-----------------|
| Number of patients                         | 4                                  |                 |
| Age at first symptoms (years)              |                                    | 11 (10.5)       |
| Initial phenotype                          |                                    |                 |
| Fatigability                               | 3/3 (100%)                         |                 |
| Proximal weakness                          | 4/4 (100%)                         |                 |
| Distal weakness                            | 0/4 (0%)                           |                 |
| Axial muscle weakness                      | 2/4 (50%)                          |                 |
| Ptosis                                     | 0/4 (0%)                           |                 |
| Ophthalmoparesis                           | 0/4 (0%)                           |                 |
| Facial weakness                            | 1/4 (25%)                          |                 |
| Bulbar symptoms                            | 1/4 (25%)                          |                 |
| Respiratory symptoms                       | 1/4 (25%)                          |                 |
| Sudden childhood respiratory insufficiency | 0/4 (0%)                           |                 |
| Scoliosis                                  | 1/4 (25%)                          |                 |
| Contractures                               | 1/4 (25%)                          |                 |
| Arthrogryposis                             | 0/4 (0%)                           |                 |
| Intellectual disability                    | 1/4 (25%)                          |                 |
| Delayed motor milestones                   | 2/4 (50%)                          |                 |
| Neonatal hypotonia                         | 0/4                                |                 |
| CK                                         |                                    |                 |
| Patients with elevated CK                  | 4/4 (100%)                         |                 |
| CK value (U/L)                             |                                    | 2035.3 (1291.8) |
| ENMG                                       |                                    |                 |
| Decrement on 3-Hz RNS                      | 4/4 (100%)                         |                 |
| Post-exercise increment                    | 0/4 (0%)                           |                 |
| R-CMAP                                     | 0/4 (0%)                           |                 |
| Muscle biopsy                              |                                    |                 |
| Normal                                     | 0/4 (0%)                           |                 |
| Type I fibre predominance                  | 2/4 (50%)                          |                 |
| Type II fibre atrophy                      | 0/4 (0%)                           |                 |
| Fibre size disproportion                   | 0/4 (0%)                           |                 |
| Nuclear internalizations                   | 1/4 (25%)                          |                 |
| Lipid surcharge                            | 0/4 (0%)                           |                 |
| Mitochondrial abnormalities                | 0/4 (0%)                           |                 |
| Core-like lesions                          | 0/4 (0%)                           |                 |
| Tubular aggregates                         | 0/4 (0%)                           |                 |
| Necrotic/regenerating fibres               | 4/4 (100%)                         |                 |
| Abnormal NMJ on electron microscopy        | NA                                 |                 |
| Long-term prognosis                        |                                    |                 |
| Exacerbations                              | 1/4 (25%)                          |                 |
| ICU admissions                             | 0/4 (0%)                           |                 |
| Respiratory assistance                     | 0/4 (0%)                           |                 |
| Wheelchair-bound                           | 1/4 (25%)                          |                 |
| Both ventilated and wheelchair-bound       | 0/4 (0%)                           |                 |
| MGFA score $\geq 4$                        | 1/4 (25%)                          |                 |
| Improvement with treatment                 |                                    |                 |
| AChE inhibitors                            | 3/4 (75%)                          |                 |
| 3,4-DAP                                    | NA                                 |                 |
| Salbutamol                                 | 1/1 (100%)                         |                 |
| Ephedrine                                  | NA                                 |                 |
| Fluoxetine                                 | NA                                 |                 |
| Quinidine                                  | NA                                 |                 |

CK = creatine kinase, ENMG = electroneuromyography, RNS = repetitive nerve stimulation, R-CMAP = repetitive compound muscle action potential, NMJ = neuromuscular junction, ICU = intensive care unit, MGFA = Myasthenia Gravis Foundation of America, AChE = acetylcholine esterase, 3,4-DAP = 3,4-diaminopyridine, NA = not available

**Supplementary Table 13 Clinical characteristics and long-term prognosis of patients with rare genotypes (n ≤ 3)**

| Patient | Gene                | Sex | Age at first symptoms | First symptoms                                                                      | Disease course | ICU admission (age in years) | Wheelchair at last visit | Respiratory assistance at last visit (type) | Treatment response           | Other features                                                                                                             |
|---------|---------------------|-----|-----------------------|-------------------------------------------------------------------------------------|----------------|------------------------------|--------------------------|---------------------------------------------|------------------------------|----------------------------------------------------------------------------------------------------------------------------|
| 1       | <i>TOR1AIP1</i>     | F   | 25                    | Gowers' sign, axial muscle weakness, fatigability                                   | Stable         | No                           | No                       | No                                          | AChE inhibitors (+)          | Small stature                                                                                                              |
| 2       | <i>TOR1AIP1</i>     | M   | 10                    | Fatigability, difficulties in sports activities                                     | Worsening      | Yes (47)                     | No                       | Yes (NIV)                                   | AChE inhibitors (+)          | Contractures                                                                                                               |
| 3       | <i>TOR1AIP1</i>     | M   | 10                    | Fatigability, difficulties in sports activities                                     | Stable         | Yes (48)                     | No                       | Yes (NIV)                                   | NA                           | Contractures                                                                                                               |
| 4       | <i>DPAGT1</i>       | F   | 0                     | Neonatal hypotonia and respiratory insufficiency                                    | Stable         | No                           | No                       | No                                          | AChE inhibitors (-)          | Contractures                                                                                                               |
| 5       | <i>DPAGT1</i>       | F   | 0                     | Neonatal hypotonia                                                                  | Worsening      | No                           | Yes                      | No                                          | AChE inhibitors (+)          | Contractures, delayed motor milestones, intellectual disability, optic disk atrophy, epilepsy, deafness, cerebellar ataxia |
| 6       | <i>DPAGT1</i>       | F   | 0                     | Neonatal hypotonia                                                                  | Worsening      | Yes (18)                     | Yes                      | No                                          | AChE inhibitors (+)          | Contractures, delayed motor milestones, intellectual disability, optic disk atrophy, epilepsy                              |
| 7       | <i>SLC5A7</i>       | M   | 0                     | Neonatal hypotonia respiratory insufficiency, sudden apnoea                         | Improvement    | Yes (0)                      | No                       | No                                          | AChE inhibitors (+)          | /                                                                                                                          |
| 8       | <i>SLC5A7</i>       | M   | 0                     | Neonatal hypotonia and respiratory insufficiency                                    | Worsening      | Yes (0)                      | Yes                      | Yes (tracheotomy)                           | AChE inhibitors (+)          | Arthrogryposis (equinovarus), epilepsy                                                                                     |
| 9       | <i>CHAT</i>         | M   | 4                     | Episodic apnoea, limb muscle weakness                                               | Improvement    | No                           | No                       | No                                          | AChE inhibitors, 3,4-DAP (+) | Delayed motor milestones, learning difficulties                                                                            |
| 10      | <i>CHAT</i>         | M   | 2                     | Episodic apnoea, limb muscle weakness                                               | Improvement    | No                           | No                       | No                                          | AChE inhibitors, 3,4-DAP (+) | Delayed motor milestones, learning difficulties                                                                            |
| 11      | <i>SLC18A3/CHAT</i> | F   | 0                     | Neonatal hypotonia, episodic apnoea, feeding difficulties, ptosis, ophthalmoparesis | Improvement    | Yes (0)                      | No                       | No                                          | AChE inhibitors (+)          | /                                                                                                                          |

|    |                |   |    |                                                                 |           |         |     |    |                                 |                                                    |
|----|----------------|---|----|-----------------------------------------------------------------|-----------|---------|-----|----|---------------------------------|----------------------------------------------------|
| 12 | <i>CHRNA1</i>  | M | 0  | Feeding difficulties, proximal muscle weakness                  | Worsening | No      | Yes | No | AChE inhibitors (+)             | Jaw malformation, and arthrogryposis (equinovarus) |
| 13 | <i>CHRNBI</i>  | F | 0  | Neonatal respiratory insufficiency, ptosis, ophthalmoparesis    | Stable    | Yes (0) | No  | No | AChE inhibitors, 3,4-DAP (+)    | /                                                  |
| 14 | <i>COL13A1</i> | F | 10 | Axial muscle weakness, scoliosis, fatigability, bulbar symptoms | Stable    | No      | No  | No | AChE inhibitors, 3,4-DAP (/)    | Retrognathia and low-set ears                      |
| 15 | <i>LRP4</i>    | F | 19 | Fatigability, muscle weakness                                   | Worsening | No      | No  | No | AChE inhibitors, salbutamol (-) | Cenani-Lenz syndrome                               |
| 16 | <i>SCNA4</i>   | F | 0  | Neonatal hypotonia, muscle weakness, bulbar symptoms            | Stable    | No      | No  | No | AChE inhibitors, 3,4-DAP (/)    | Small stature                                      |

Treatment response: (+) = improvement; (/) = no effect; (-) = worsening.

F = female; M = male; ICU = intensive care unit; AChE = acetylcholinesterase; 3,4-DAP = 3, 4-diaminopyridine; NIV = non-invasive ventilation; NA = not available.

**Supplementary Table 14: Paraclinical findings of patients with rare genotypes (n ≤ 3)**

| Patient | Gene                | Sex | Age at first symptoms | Elevated CK level: Yes/No (value; UI/L) | ENMG:<br>- Decrement on 3-Hz RNS<br>- Post-exercise increment<br>- R-CMAP | Muscle biopsy                                            |
|---------|---------------------|-----|-----------------------|-----------------------------------------|---------------------------------------------------------------------------|----------------------------------------------------------|
| 1       | <i>TOR1AIP1</i>     | F   | 25                    | No (NA)                                 | - Yes<br>- Yes<br>- No                                                    | Fibre size disproportion<br>Nuclear internalizations     |
| 2       | <i>TOR1AIP1</i>     | M   | 10                    | Yes (227)                               | - Yes<br>- Yes<br>- No                                                    | NA                                                       |
| 3       | <i>TOR1AIP1</i>     | M   | 10                    | No (NA)                                 | - Yes<br>- Yes<br>- No                                                    | NA                                                       |
| 4       | <i>DPAGT1</i>       | F   | 0                     | No (97)                                 | - Yes<br>- Yes<br>- No                                                    | Tubular aggregates                                       |
| 5       | <i>DPAGT1</i>       | F   | 0                     | No (100)                                | - Yes<br>- Yes<br>- No                                                    | Type I fibre predominance<br>Mitochondrial abnormalities |
| 6       | <i>DPAGT1</i>       | F   | 0                     | No (73)                                 | - Yes<br>- Yes<br>- No                                                    | Type I fibre predominance<br>Lipid surcharge             |
| 7       | <i>SLC5A7</i>       | M   | 0                     | No (NA)                                 | - Yes<br>- Yes<br>- No                                                    | Normal                                                   |
| 8       | <i>SLC5A7</i>       | M   | 0                     | NA                                      | - Yes<br>- Yes<br>- No                                                    | NA                                                       |
| 9       | <i>CHAT</i>         | M   | 4                     | NA                                      | - Yes<br>- Yes<br>- No                                                    | Normal                                                   |
| 10      | <i>CHAT</i>         | M   | 2                     | NA                                      | - Yes<br>- Yes<br>- No                                                    | NA                                                       |
| 11      | <i>SLC18A3/CHAT</i> | F   | 0                     | NA                                      | - Yes<br>- Yes<br>- No                                                    | Normal                                                   |
| 12      | <i>CHRNA1</i>       | M   | 0                     | NA                                      | - Yes<br>- Yes<br>- No                                                    | NA                                                       |
| 13      | <i>CHRNB1</i>       | F   | 0                     | NA                                      | - Yes<br>- Yes<br>- No                                                    | NA                                                       |
| 14      | <i>COL13A1</i>      | F   | 10                    | NA                                      | - Yes<br>- Yes<br>- No                                                    | NA                                                       |
| 15      | <i>LRP4</i>         | F   | 19                    | Yes (233)                               | - Yes<br>- Yes<br>- No                                                    | NA                                                       |
| 16      | <i>SCNA4</i>        | F   | 0                     | No (42)                                 | - Yes<br>- Yes<br>- No                                                    | Type I fibre predominance<br>Fibre size disproportion    |

CK = creatine kinase, ENMG = electroneuromyography, RNS = repetitive nerve stimulation, R-CMAP = repetitive compound muscle action potential, NA = not available.

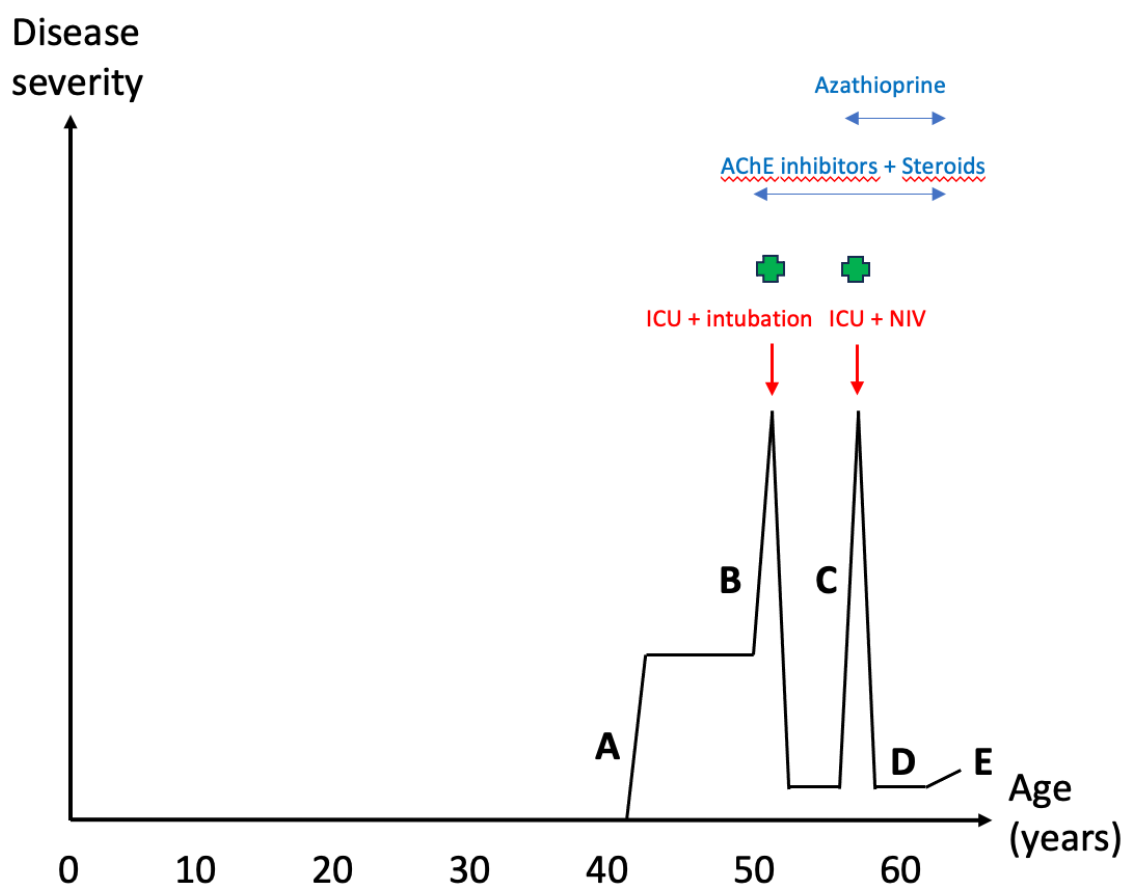

**Supplementary Figure 1: A representative DOK7 patient with late-onset and misdiagnosed as myasthenia gravis.**

(A): At 42, the patient developed a drop-head, and ptosis and complained of fatigue. (B): At 50, he presented an acute respiratory failure requiring ICU admission and oral intubation. The patient received intravenous immunoglobulins and acetylcholinesterase inhibitors associated with oral corticosteroids were started. (C): At 55, he presented a second respiratory failure requiring ICU admission and non-invasive ventilation, and received a new intravenous immunoglobulin infusion. Azathioprine was started. (D): Stability was reached at 58, with residual ptosis and neck muscle weakness. (E): He developed progressive respiratory symptoms. The genetic diagnosis of congenital myasthenic syndrome was made, and immunomodulatory treatments were stopped.

ICU: intensive care unit, NVI: non-invasive ventilation, AChE: acetylcholinesterase. Green cross: intravenous immunoglobulin infusion.

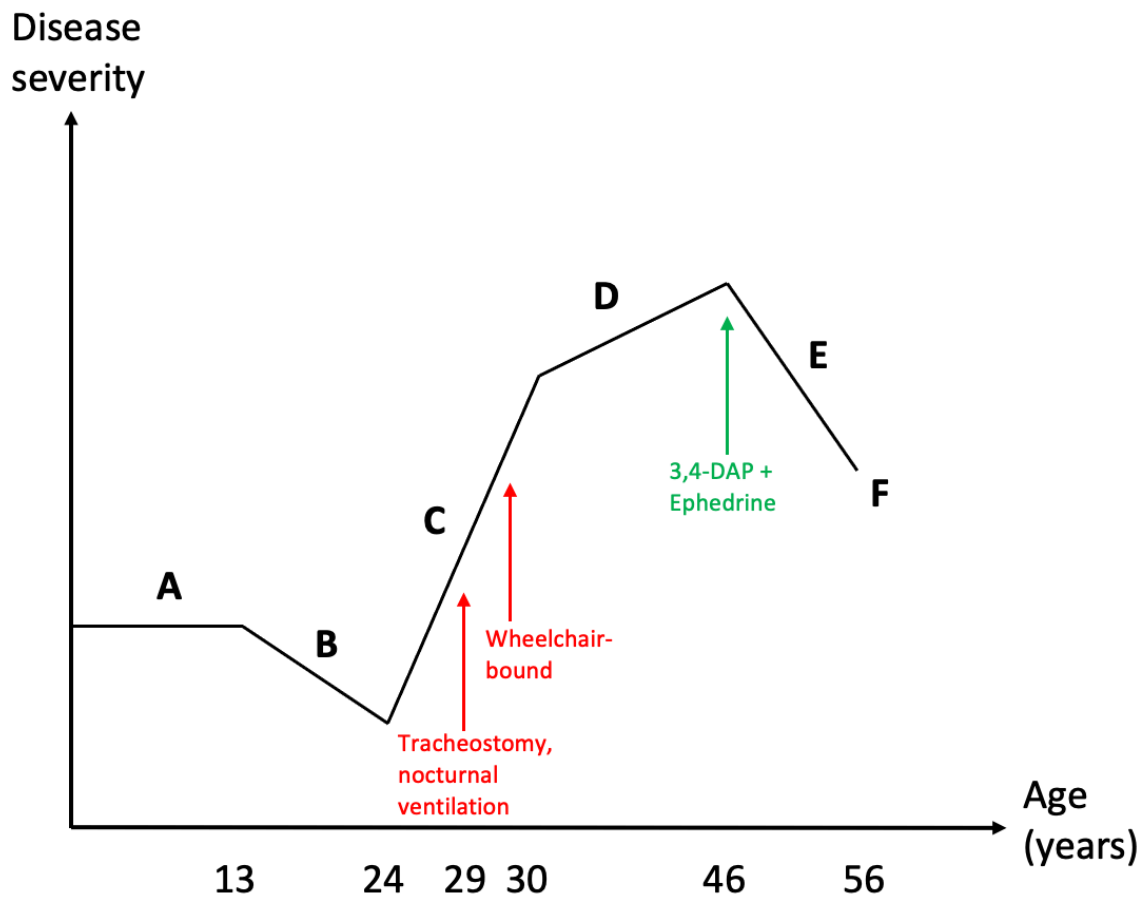

**Supplementary Figure 2: A representative DOK7 patient with a multiphasic disease course.**

(A) After respiratory distress at birth requiring ICU admission, the patient had stable proximal muscle weakness, ptosis, ophthalmoparesis and bulbar symptoms during childhood. (B) His proximal muscle weakness progressively improved during his teenage years. (C) Since 24 years, he reported a progressive worsening of its symptoms, leading to a tracheostomy with nocturnal ventilation at 29, and he became wheelchair-bound at 30. (D): In his forties, his upper limb weakness progressively worsened. (E) At 46, the start of 3,4-DAP and ephedrine after the genetic diagnosis allowed an improvement in arm strength and in proximal lower limb strength allowing him to walk 30 meters. (F) He died at 56 after falling down the stairs.
